# **Differential Response of Digesta- and Mucosa-Associated Intestinal Microbiota to Dietary Black Soldier Fly (*Hermetia illucens*) Larvae Meal in Seawater Phase Atlantic Salmon (*Salmo salar*)**

Yanxian Li<sup>a#</sup>, Leonardo Bruni<sup>b</sup>, Alexander Jaramillo-Torres<sup>a</sup>, Karina Gajardo<sup>a\*</sup>, Trond M. Kortner<sup>a</sup>, Åshild Krogdahl<sup>a</sup>

<sup>a</sup>Department of Paraclinical Sciences, Faculty of Veterinary Medicine, Norwegian University of Life Sciences, Oslo, Norway.

<sup>b</sup>Department of Agriculture, Food, Environment and Forestry, University of Florence, Firenze, Italy.

Running Head: Response of Salmon Gut Flora to Dietary Insect Meal

<sup>#</sup>Address correspondence to Yanxian Li, [yanxian.li@nmbu.no](mailto:yanxian.li@nmbu.no)

<sup>\*</sup>Present address: Biomar AS, Havnegata 9, 7010 Trondheim, Norway

Yanxian Li and Leonardo Bruni contributed equally to this work. Author order was selected based on CRediT (Contributor Roles Taxonomy).

Word counts: Abstract, 191 words; text, 4919 words

## ABSTRACT

Intestinal digesta is commonly used for studying responses of microbiota to dietary shifts, yet evidence is accumulating that it represents an incomplete view of the intestinal microbiota. In a 16-week seawater feeding trial, Atlantic salmon (*Salmo salar*) were fed either a commercially-relevant reference diet or an insect meal diet containing ~15% black soldier fly larvae meal. The digesta- and mucosa-associated distal intestinal microbiota were profiled by 16S rRNA gene sequencing. Regardless of diet, we observed substantial differences between digesta- and mucosa-associated intestinal microbiota. Microbial richness and diversity were much higher in the digesta than the mucosa. The insect meal diet altered the distal intestinal microbiota resulting in higher microbial richness and diversity. The diet effect, however, depended on the sample origin. Digesta-associated intestinal microbiota showed more pronounced changes than the mucosa-associated microbiota. Lastly, multivariate association analyses identified two mucosa-enriched taxa, *Brevinema andersonii* and unclassified *Spirochaetaceae*, associated with the expression of genes related to immune responses and barrier function in the distal intestine, respectively. Overall, our data clearly indicate that responses in digesta- and mucosa-associated microbiota to dietary inclusion of insect meal differ, with the latter being more resilient to dietary changes.

## IMPORTANCE

While fecal samples provide a convenient, non-invasive way for profiling intestinal microbiota, heterogeneity in the microbial community assemblage between intestinal digesta and mucosa is well recognized. The present work provides insights into the differences between digesta- and mucosa-associated intestinal microbiota in Atlantic salmon and how they respond differently to dietary perturbations. Mucosa-associated intestinal microbiota seemed more resilient to variation in diet composition than digesta-associated intestinal microbiota. Most likely, not only the digesta associated microbiota, but also the mucosa-associated, play key roles in shaping the host metabolism. Therefore, our work emphasizes the necessity of profiling both digesta- and mucosa-associated intestinal microbiota to understand the impact of variation in diet composition on intestinal microbiota.

**KEYWORDS:** microbiota, gut biogeography, Atlantic salmon, diet, black soldier fly

# INTRODUCTION

The reduction in the sequencing costs and the advent of bioinformatics in the past decade have enabled in-depth taxonomic and functional profiling of microbial communities from diverse environments at an unprecedented scale. Recent advances in the microbiome studies have shed light on the role of intestinal microbiota in a wide spectrum of host physiological processes and development of diseases, such as helping digestion and absorption (1), modulating lipid metabolism and energy balance (2, 3), dialoguing with the central nervous system through the so-called microbiota-gut-brain axis (4) and being a risk factor or a therapeutic intervention of inflammatory bowel disease (5-8). Diet is one of the key factors in shaping the intestinal microbiota. While long-term dietary habits have a considerable effect on the structure and activity of host intestinal microbiota (9-11), short-term dietary change also alters the intestinal microbiota in a rapid and reproducible way (12). Different dietary components selectively promote or suppress the growth of certain microbial clades, which in turn could inflict important effects on the host health and disease resistance (13, 14).

Atlantic salmon (*Salmo salar*) is the most produced seawater fish species and one of the most economically important farmed fish worldwide (15). While Atlantic salmon are strictly carnivorous in the wild, farmed Atlantic salmon have experienced a substantial shift in the diet composition due to a limited supply of marine ingredients. Marine ingredients used for Norwegian farmed Atlantic salmon have gradually been replaced by plant sources, decreasing from ~90% in 1990 to ~25% in 2016 (16). Due to concerns on

---

the economic, environmental and social sustainability of the current raw materials for Atlantic salmon farming (15), more sustainable alternative feed ingredients, such as insects (17) and yeasts (18), have been developed and used. The use of alternative feed ingredients may not only affect the nutrient utilization, fish growth, health, welfare and product quality, but also intestinal microbiota in Atlantic salmon (19-21). While studies in mammals and fish have revealed substantial differences between the digesta- and mucosa-associated intestinal microbiota (19, 22-25), most studies investigating diet effects on the intestinal microbiota of fish have sampled the digesta only or a mixture of digesta and mucosa. Evidence is accumulating that digesta- and mucosa-associated intestinal microbiota in fish respond differently to dietary changes (19, 26-29). Profiling only one of or a mixture of digesta- and mucosa-associated microbiota may obscure the response of intestinal microbiota to dietary changes.

Characterizing intestinal microbiota and its associations with host responses is an essential step towards identifying key microbial clades promoting fish health and welfare. Ultimately, a milestone in the fish microbiota research would be knowing how to selectively manipulate the microbiota to improve the growth performance, disease resistance and health status of farmed fish. The main aims of the work presented herein were (i) to compare distal intestinal microbiota of Atlantic salmon fed a commercially relevant diet and an insect meal-based diet, (ii) to further explore the dissimilarity between digesta- and mucosa-associated microbiota and the differences in their response to dietary changes, and (iii) to identify associations between microbial clades and host responses. This work was part of a larger study consisting of a freshwater and seawater

feeding trial that aimed to investigate the nutritional value and possible health effects for Atlantic salmon of a protein-rich insect meal produced from black soldier fly (*Hermetia illucens*) larvae. The present work focuses on the intestinal microbiota in seawater-phase Atlantic salmon fed an insect meal diet containing ~15% black soldier fly larvae meal for 16 weeks. Results on feed utilization, growth performance, fillet quality, intestinal histomorphology and gene expression have been reported elsewhere (30-32).

## RESULT

Hereafter, different sample groups are named based on the combination of diet (REF vs. IM) and sample origin (DID vs. DIM). Hence, in addition to the extraction blanks, library blanks and mock, we have four different sample types, i.e., REF-DID, REF-DIM, IM-DID and IM-DIM.

### qPCR

Since Cq values of most mucosa DNA templates were out of the linear range of the standard curve, the raw Cq value was used as a proxy of 16S rRNA gene quantity in the diluted DNA templates (Figure S1). On average, REF-DID showed the highest 16S rRNA gene quantities (mean Cq = 24.7), followed by the mocks (mean Cq = 26.1) and IM-DID (mean Cq = 28.4). Irrespective of diet, mucosa DNA templates (REF-DIM, IM-DIM) showed similar 16S rRNA gene quantities (mean Cq = 30) that were close to extraction blanks (mean Cq = 32.4).

### Taxonomic composition

All the eight bacterial species included in the mock were successfully identified at

genus level with *E. faecalis*, *L. fermentum*, *L. monocytogenes* and *S. aureus* further being annotated at the species level (Figure S2A). At the genus level, the average Pearson's *r* between the expected and observed taxonomic profile of the mock was 0.33, whereas the Pearson's *r* between the observed taxonomic profile of the mock was 0.98. The relative abundance of most Gram-positive bacteria, *L. monocytogenes* and *E. faecalis* in particular, were underestimated. In contrast, the relative abundance of Gram-negative bacteria was overestimated. Most ASVs (97.5% - 99.9%) in the extraction and library blanks were classified as *Pseudomonas* (Figure S2B), which was the main contaminating taxon removed from the biological samples along with other contaminants including *Curtobacterium*, *Jeotgalicoccus*, *Modestobacter*, *Cutibacterium*, *Hymenobacter*, *Brevundimonas*, *Micrococcus*, *Sphingomonas*, *Devosia*, *Sphingomonas aurantiaca* and *Marinobacter adhaerens*. The exact sequence of the contaminating ASVs and their relative abundance in the extraction and library blanks are available in Table S1.

The taxonomic composition of mucosa samples showed higher similarity than that of the digesta samples, which were more diet-dependent (Figure 1). At the phylum level, the dominant taxa of mucosa samples for both diets were *Spirochaetes* (REF-DIM, 72 ± 34.6 %; IM-DIM, 47 ± 35.2 %) (mean ± S.D.), *Proteobacteria* (REF-DIM, 21 ± 34.1 %; IM-DIM, 23 ± 34.1 %), *Firmicutes* (REF-DIM, 1 ± 2.8 %; IM-DIM, 11 ± 13.5 %), *Tenericutes* (REF-DIM, 4 ± 8 %; IM-DIM, 8 ± 18.8 %) and *Actinobacteria* (REF-DIM, 1 ± 3.4 %; IM-DIM, 9 ± 8.7 %). For digesta samples, the dominant taxa of REF-DID were *Tenericutes* (33 ± 23.1 %), *Proteobacteria* (31 ± 29.9 %), *Firmicutes* (25 ± 21.1 %) and *Spirochaetes* (9 ± 12.9 %), whereas IM-DID was dominated by *Firmicutes* (45 ±

16.9 %), *Actinobacteria* ( $25 \pm 9.5$  %), *Proteobacteria* ( $17 \pm 27.8$  %), *Tenericutes* ( $7 \pm 8.8$  %) and *RsaHF231* ( $4 \pm 1.5$  %) (Figure 1A). At the genus level, the dominant taxa of mucosa samples for both diets were *Brevinema* (REF-DIM,  $52 \pm 40.1$  %; IM-DIM,  $25 \pm 35$  %), unclassified *Spirochaetaceae* (REF-DIM,  $20 \pm 31.8$  %; IM-DIM,  $22 \pm 31.4$  %), *Aliivibrio* (REF-DIM,  $18 \pm 33.5$  %; IM-DIM,  $18 \pm 35.3$  %) and *Mycoplasma* (REF-DIM,  $4 \pm 8$  %; IM-DIM,  $8 \pm 18.8$  %). For digesta samples, the dominant taxa of REF-DID were *Mycoplasma* ( $33 \pm 23.1$  %), *Aliivibrio* ( $20 \pm 32.3$  %), *Photobacterium* ( $10 \pm 12.6$  %), *Brevinema* ( $6 \pm 12.5$  %) and *Lactobacillus* ( $5 \pm 4$  %), whereas IM-DID was dominated by *Aliivibrio* ( $15 \pm 28.2$  %), unclassified *Lactobacillales* ( $14 \pm 6$  %), *Corynebacterium 1* ( $13 \pm 5$  %), *Bacillus* ( $8 \pm 3.4$  %), *Mycoplasma* ( $7 \pm 8.8$  %) and *Actinomyces* ( $5 \pm 2$  %) (Figure 1B).

## Core microbiota

In total, 108 taxa were identified as core microbiota based on their prevalence in each sample type (Figure 2; Table S2). Specifically, *Aliivibrio*, *Brevinema andersonii*, and *Mycoplasma* were identified as core microbiota for all the sample types, the latter two being universally present in all the samples. Additionally, ten taxa were identified as core microbiota for digesta samples (REF-DID and IM-DID), which included *Bacillus*, *Corynebacterium 1*, *Lactobacillus* (*L. aviaries*, *L. fermentum* and two unclassified species), *Leuconostoc*, *Parageobacillus toebii*, *Ureibacillus* and *Weissella*. No additional core microbiota taxa were identified for the mucosa samples (REF-DIM and IM-DIM). *Actinomyces*, *Corynebacterium 1*, *Corynebacterium aurimucosum* ATCC 70097, *Microbacterium* and unclassified *RsaHF23* were the additional core microbiota taxa



identified for fish fed the insect meal diet (IM-DID and IM-DIM), whereas no additional core microbiota taxa were identified for fish fed the reference diet (REF-DID and REF-DIM). Lastly, 86 taxa were found to be more prevalent in IM-DID than in any other sample type.

## **Alpha-diversity**

Regardless of diet, all the alpha-diversity indices were higher in digesta samples than mucosa samples ( $p < 0.05$ ) (Figure 3). Independent of sample origin, all the alpha-diversity indices were higher in fish fed the IM diet than those fed the REF diet ( $p < 0.05$ ). A significant interaction between the diet and sample origin effect was detected for the observed species ( $p = 0.031$ ) and Faith's phylogenetic diversity ( $p = 0.002$ ), both of which showed a stronger diet effect in digesta samples than mucosa samples.

## **Beta-diversity**

The PCoA plots built on the Jaccard and unweighted UniFrac distance matrix showed clear separations of samples belonging to different dietary groups and sample origins (Figure 4A-B). However, the average distance between samples from different dietary groups was dependent on sample origin. Specifically, mucosa samples from different dietary groups formed clusters close to each other, whereas digesta samples from different dietary groups were far apart. The PCoA plots built on the Aitchison and PHILR transformed Euclidean distance matrix also showed separations of samples belonging to different dietary groups and sample origins (Figure 4C-D). Again, the average distance between samples from different dietary groups was dependent on sample origin. Mucosa samples from different dietary groups formed clusters boarding (Figure 4C) or

overlapping (Figure 4D) each other, whereas digesta samples from different dietary groups were more clearly separated.

The PERMANOVA and its following conditional contrasts largely confirmed the PCoA results. Regardless of the distance matrix used, both main factors had significant effects on the beta-diversity and their interaction was significant as well ( $p < 0.05$ ) (Table 1). Results on the tests of homogeneity of multivariate dispersions are shown in Table 2. For Jaccard distance, significant differences in the multivariate dispersions were observed between digesta and mucosa samples for both diets (REF-DID VS. REF-DIM,  $p = 0.045$ ; IM-DID VS. IM-DIM,  $p = 0.002$ ), and between diets for digesta samples (REF-DID VS. IM-DID,  $p = 0.002$ ). For unweighted UniFrac distance, IM-DID showed lower multivariate dispersions than other sample types resulting in significant differences compared to REF-DID ( $p = 0.002$ ) and IM-DIM ( $p = 0.002$ ). For Aitchison distance, REF-DIM showed lower multivariate dispersions than other sample types resulting in significant differences compared to REF-DID ( $p = 0.046$ ) and IM-DIM ( $p = 0.046$ ). For PHILR transformed Euclidean distance, the differences in the multivariate dispersions among the sample types were not significant ( $p > 0.05$ ).

## **Significant associations between microbial clades and sample metadata**

The multivariate association analysis identified 53 taxa showing significant associations with the metadata of interest (Figure 5A). The diagnostic plots showing the raw data underlying the significant associations are shown in Figures S3-8. Forty-seven differentially abundant taxa were identified for the sample origin effect, 45 of which, including *Bacillus*, *Enterococcus*, *Flavobacterium*, *Lactobacillus*, *Lactococcus*,

206 *Leuconostoc*, *Mycoplasma*, *Peptostreptococcus*, *Photobacterium*, *Staphylococcus*,  
207 *Streptococcus*, *Vagococcus* and *Weissella*, showed lower relative abundances in the  
208 mucosa than the digesta (Figure S3). In contrast, two taxa belonging to the *Spirochaetes*  
209 phylum, *B. andersonii* and unclassified *Spirochaetaceae*, were enriched in the mucosa  
210 (Figure 5B). Thirty-six differentially abundant taxa were identified for the diet effect, 26  
211 of which showed increased relative abundances in fish fed the IM diet (Figure S4).  
212 Among these 26 taxa, some were enriched in both intestinal digesta and mucosa which  
213 included *Actinomyces*, unclassified *Bacillaceae*, *Bacillus*, unclassified *Beutenbergiaceae*,  
214 *Brevibacterium*, *Corynebacterium* 1, *Enterococcus*, unclassified *Lactobacillales*,  
215 *Microbacterium*, *Oceanobacillus* and unclassified *RsaHF231* (partially illustrated as  
216 Figure 5C). For the histological scores, the relative abundance of unclassified  
217 *Sphingobacteriaceae* and unclassified *RsaHF231* were found to increase and decrease,  
218 respectively, in fish scored abnormal regarding lamina propria cellularity (lpc) in distal  
219 intestine (Figure S5). The relative abundance of *Acinetobacter* and *Pseudomonas* were  
220 negatively correlated with the distal intestine somatic index (DISI) (Figure S6). Six taxa,  
221 including *Actinomyces*, *B. andersonii*, *Kurthia*, *Lysobacter*, *Microbacterium* and the  
222 unclassified *Sphingobacteriaceae*, were found to associate with the expression of genes  
223 related to immune responses (Figure S7). Notably, the relative abundance of *B. andersonii*  
224 showed a clear positive correlation with the expression levels of immune genes (Figure  
225 5D), which decreased as the PC1 of the PCA increased. Furthermore, 3 taxa including  
226 *Cellulosimicrobium*, *Glutamicibacter* and the unclassified *Spirochaetaceae* were found  
227 to associate with the expression of genes related to barrier functions (Figure S8). The

relative abundance of the unclassified *Spirochaetaceae* showed a negative correlation with the expression levels of barrier function relevant genes (Figure 5E), which decreased as the PC1 of the PCA increased.

## DISCUSSION

### Core microbiota

In accordance with previous studies in Atlantic salmon (20, 33-38), *Aliivibrio*, *B. andersonii* and *Mycoplasma* were identified as core microbiota in the present study. *Aliivibrio* is commonly found in the seawater phase Atlantic salmon intestine (35-37, 39-43) and has been identified as a core taxon of both wild and captive Atlantic salmon (34, 36, 37). Provided its common presence in seawater, *Aliivibrio* may have originated from the surrounding water and colonized the intestinal mucosa as Atlantic salmon constantly drink seawater to prevent dehydration in a hyperosmotic environment. Currently, the taxon *Aliivibrio* comprises of four closely related species including *Aliivibrio fischeri*, *Aliivibrio logei*, *Aliivibrio salmonicida* and *Aliivibrio wodanis*, which were split from the *Vibrio* genus and reclassified as *Aliivibrio* in 2007 (44). Strains of *A. fischeri* and *A. logei* have been described as bioluminescent symbionts of certain fishes and squids (45), whereas *A. salmonicida* and *A. wodanis* have been identified as pathogens for Atlantic salmon causing cold-water vibriosis (46) and ‘winter ulcer’ (47), respectively.

Though *Spirochaetes* has typically been found in low abundances in the Atlantic salmon intestine (19, 23, 27, 39), two recent studies have identified *B. andersonii* as a core taxon of both digesta- and mucosa-associated intestinal microbiota in seawater phase

---

Atlantic salmon (35, 36). Furthermore, *B. andersonii* is also a predominant taxon in the digesta and mucosa in one of the studies (36). *B. andersonii* was initially isolated from short-tailed shrews (*Blarina brevicauda*) and white-footed mice (*Peromyscus leucopus*) as an infectious pathogen (48). This taxon has also been found in the intestine and gill tissue of rainbow trout (*Oncorhynchus mykiss*) (49), and intestinal digesta of Senegalese sole (*Solea senegalensis*)(50).

*Mycoplasma* is widely distributed in nature and well known for its minute size and lack of cell wall. Like *Aliivibrio*, *Mycoplasma* has been frequently identified as a core taxon of both wild and captive Atlantic salmon as well (20, 33, 35-38). It was found to be more abundant in marine adults than in freshwater juvenile Atlantic salmon (37) and sporadically predominate intestinal microbial community in the digesta (20, 36, 37, 41, 51) and mucosa (35) reaching as high as > 90% of total read counts in extreme cases. Due to its small compact genome and limited biosynthesis capacities, *Mycoplasma* typically forms obligate parasitic or commensal relationships with its host to obtain necessary nutrients such as amino acids, fatty acids and sterols (52). The major acids produced by *Mycoplasma* during fermentation are lactic acid and acetic acid (53), the latter of which was found in our recent studies to be 2-4 orders of magnitude higher than other short-chain fatty acids in the Atlantic salmon distal intestine (unpublished data). A recent study found that Atlantic salmon *Mycoplasma*, recovered by shotgun metagenomic sequencing, was closely related to *Mycoplasma penetrans* and *Mycoplasma yeatsii* (20). Compared to these closely related *Mycoplasma* species, the salmon *Mycoplasma* appears to carry a much lower number of unique genes that are enriched in carbohydrate uptake and low in

peptidase synthesis.

## Sample origin effect

In line with previous findings in mammals and fish (19, 22-25), we observed substantial differences between digesta- and mucosa-associated microbiota. The microbial richness and diversity were much higher in the digesta than the mucosa, as previously observed in seawater phase Atlantic salmon (19, 23, 36). Furthermore, most of the bacterial taxa in the distal intestine, including those commonly found in the Atlantic salmon intestine such as *Bacillus*, *Enterococcus*, *Flavobacterium*, *Lactobacillus*, *Lactococcus*, *Leuconostoc*, *Mycoplasma*, *Peptostreptococcus*, *Photobacterium*, *Staphylococcus*, *Streptococcus*, *Vagococcus* and *Weissella*, were less abundant in the mucosa than in the digesta. These results are suggestive of a selection pressure from the host that determines which microbial clades colonize and flourish in the intestinal mucus layer (54). In this study, two taxa belonging to the *Spirochaetes* phylum, *B. andersonii* and unclassified *Spirochaetaceae*, were more abundant in the distal intestine mucosa than the digesta. As aforementioned, *Spirochaetes* were typically found in low abundances in the Atlantic salmon intestine. Yet a recent study also showed that irrespective of diets *B. andersonii* seemed to be more abundant in the intestinal mucosa than the digesta of seawater phase Atlantic salmon (36). Known for high motility and chemotactic attraction to mucin, some *Spirochaetes* can penetrate the mucus and associate with the intestinal mucosa (55-57). Further work is required to confirm whether these taxa are consistently enriched in the intestinal mucus layer of seawater phase Atlantic salmon.

## Diet effect

Diet is one of the key factors in shaping the fish intestinal microbiota. In agreement with previous findings in rainbow trout (29, 58, 59) and laying hens (60, 61), we found that the insect meal diet altered the distal intestinal microbiota assemblage resulting in higher microbial richness and diversity. Our findings, showing that the insect meal diet increased the relative abundance of *Actinomyces*, *Bacillus*, *Brevibacterium*, *Corynebacterium* 1 and *Enterococcus*, are in accord with recent studies in rainbow trout fed diets containing 30% black soldier fly larvae meal (29, 59). Importantly, these results were partly confirmed in other studies employing fluorescence *in situ* hybridization for targeted profiling of changes in the intestinal microbiota. Specifically, increased absolute abundance of *Lactobacillus/Enterococcus* was found in rainbow trout fed 20% dietary black soldier fly larvae meal (62), whereas increased absolute abundance of *Bacillus*, *Enterococcus* and *Lactobacillus* was documented in Siberian sturgeon (*Acipenser baerii*) fed 15% black soldier fly larvae meal (63).

The increases in the relative abundance of specific microbial clades in Atlantic salmon fed the insect meal diet may be explained by feed-borne microbiota and/or feed composition. Bacterial taxa, including *Actinomyces*, *Bacillus*, *Brevibacterium*, *Corynebacterium*, *Enterococcus*, *Oceanobacillus* and *RsaHF231*, have been found in black soldier fly whole larvae or larvae intestine (64-67). The fact that *RsaHF231* has not been documented in fish before indicates that these bacterial taxa may have partially originated from black soldier fly larvae meal. Our results from the freshwater feeding trial showed that these bacterial taxa were also enriched in the intestinal digesta and mucosa

---

of Atlantic salmon smolts fed an insect meal diet containing 60% soldier fly larvae meal. Importantly, these bacterial taxa were also detected in the feed pellets which contained considerable amount of bacterial DNA that is comparable to intestinal digesta (unpublished data). Given the hydrothermal treatments the feed pellets underwent during the extrusion, the feed-borne microbiota profiled by the DNA sequencing techniques could have largely originated from dead bacteria and bacterial spores rather than living bacteria. As sequencing-based methods cannot differentiate between living and dead cells, future studies should investigate to what extent the feed-borne microbiota may contribute to, or confound the observed diet effects on intestinal microbiota, using methods that distinguish living and dead bacteria such as viability PCR and RNA sequencing (68). On the other hand, unique nutrients in the insect meal diet such as chitin, an essential component of the insect exoskeleton, may have selectively promoted the growth of certain intestinal microbes. *Actinomyces* species are often identified as active chitin degraders showing enhanced growth and activity upon chitin addition (69). Many bacterial species belonging to *Bacillus* can produce chitinase (70). *Bacillus* and *Lactobacillus* were two of the predominant taxa in the intestinal mucosa of Atlantic salmon fed a 5% chitin diet, the former of which displayed the highest *in vitro* chitinase activity (71).

### **Significant interactions between diet and sample origin effect**

We observed in the present study that the diet effect on the intestinal microbial community richness and structure was dependent on the sample origin, with mucosa-associated intestinal microbiota showing higher resilience to the dietary change. Our results corroborate previous findings in rainbow trout revealing that mucosa-associated



---

intestinal microbiota was less influenced by dietary inclusion of 30% black soldier fly larvae meal compared to digesta-associated intestinal microbiota (28, 29). Results from molecular-based studies on salmonid intestinal microbiota hitherto suggest that diet modulates digesta- and mucosa-associated intestinal microbiota to varying degrees with the latter generally being more resilient to dietary interventions (19, 26-29, 35). As such, current practices of profiling only one of or a mixture of digesta- and mucosa-associated microbiota may obscure the response of intestinal microbiota to dietary changes. To fully unveil the response of intestinal microbiota to dietary changes, we recommend concurrent profiling of digesta- and mucosa-associated intestinal microbiota whenever it is feasible.

### **Significant associations between microbial clades and sample metadata**

To our knowledge, only a few studies have carried out association analysis between intestinal microbial clades and host responses in Atlantic salmon. As such, our results should be treated as preliminary observations and critically evaluated in later studies. Herein, we highlight the significant associations between two mucosa-enriched taxa and host gene expressions in the intestine. Specifically, *B. andersonii*, part of the core microbiota, was associated with the expression of genes related to pro- and anti-inflammatory responses whereas the unclassified *Spirochaetaceae* was associated with the expression of genes related to barrier function. Intestinal microbiota is well known to modulate the local immune responses and intestinal epithelial barrier function (72). Furthermore, it is hypothesized that mucosa-associated microbiota plays a more crucial role in shaping the host immunity in that it can interact both directly and indirectly with intestinal epithelial barrier whereas digesta-associated microbiota can only interact

indirectly (54). Taken together, further research should be undertaken to investigate the potential ecological and functional significance of these two taxa for seawater phase Atlantic salmon.

### **Quality control: use of mock and negative controls**

As in any field of research, conducting a well-controlled microbiome study requires great care in the experiment design such as setting up appropriate experimental controls. The use of mock as a positive control allows for critical evaluation and optimization of microbiota profiling workflow. That all the bacterial taxa in the mock were correctly identified at the genus level indicates that the current workflow is reliable for the taxonomic profiling of intestinal microbiota. Furthermore, the taxonomic profile of mock from different DNA extraction batches was fairly similar, suggesting that the results generated by the current workflow are also largely reproducible. However, the low concordance between the expected and observed relative abundance of bacterial taxa in the mock is reminiscent of the fact that bias is introduced at different steps of the marker-gene survey (73-75), among which DNA extraction and PCR amplification are the two largest sources of bias due to preferential extraction and amplification of some microbial clades over others. In line with previous observations that Gram-positive bacteria may be more subjective to incomplete lysis during DNA extraction due to their tough cell walls (76, 77), the recovery of most Gram-positive bacteria in the mock was lower than the expected. The insufficient lysing of Gram-positive bacteria in the mock was largely mitigated in our later experiments by using a mixture of beads with different sizes for the bead beating during DNA extraction (unpublished data). The bias in the marker-gene

sequencing experiments, as reflected in the observed taxonomic profile of the mock, highlights the necessity of validating such results by absolute quantification techniques such as cultivation (if possible), qPCR, flow cytometry and fluorescence *in situ* hybridization.

Reagent contamination is a common issue in molecular-based studies of microbial communities. The main contaminating taxon identified in this study is *Pseudomonas*, which has been reported as a common reagent contaminant in numerous studies (78-84). Given the dominance of *Pseudomonas* in the negative controls of both DNA extraction and PCR, most of the observed contamination has likely derived from PCR reagents such as molecular-grade water (85-87). Notably, *Pseudomonas* has also been isolated from intestinal digesta and mucosa of Atlantic salmon by traditional culturing approaches (71, 88-90), and reported as a member of Atlantic salmon core microbiota in culture-independent studies (19, 23, 33, 34, 38, 91). Due to the low taxonomic resolution of amplicon sequencing, it is difficult to discern contaminating taxa from true signals solely based on taxonomic labels. The inclusion of negative controls, coupled with quantifications of microbial DNA concentration in the samples, has enabled fast and reliable identification of contaminating taxa in this study. Besides *Pseudomonas*, other common reagent contaminants, including *Bradyrhizobium*, *Burkholderia*, *Comamonas*, *Methylobacterium*, *Propionibacterium*, *Ralstonia*, *Sphingomonas* and *Stenotrophomonas* (83, 85, 87, 92-96), have also been frequently reported as members of Atlantic salmon intestinal microbiota, indicating that existing studies of Atlantic salmon intestinal microbiota may have been plagued with reagent contamination that is hard to ascertain

---

due to lack of negative controls. As reagent contamination is unavoidable, study-specific and can critically influence sequencing-based microbiome analyses (85, 97, 98), negative controls should always be included and sequenced in microbiome studies especially when dealing with low microbial biomass samples like intestinal mucosa.

## Conclusion

In summary, we confirmed previous findings in mammals and fish that intestinal digesta and mucosa harbor microbial communities with clear differences. Regardless of diet, microbial richness and diversity were much higher in the digesta than the mucosa. The insect meal diet altered the distal intestinal microbiota assemblage resulting in higher microbial richness and diversity. The diet effect was however dependent on the sample origin, with mucosa-associated intestinal microbiota being more resilient to the dietary change. To fully unveil the response of intestinal microbiota to dietary changes, concurrent profiling of digesta- and mucosa-associated intestinal microbiota is recommended whenever feasible. Lastly, we identified two mucosa-enriched taxa, *Brevinema andersonii* and unclassified *Spirochaetaceae*, which seemed to be associated with the expression in the distal intestine of genes related to immune responses and barrier function, respectively. As mucosa-associated microbiota could play a more critical role in shaping the host metabolism, their potential functional significance for seawater phase Atlantic salmon merits further investigations.

# **MATERIALS AND METHODS**

## **Experimental fish, diet and sampling**

A 16-week seawater feeding trial with Atlantic salmon (initial body weight = 1.40 kg, S.D. = 0.043 kg) was conducted at the Gildeskål Research Station (GIFAS), Nordland, Norway, in accordance with laws regulating the experimentation with live animals in Norway. The experimental fish were randomly assigned into 6 net pens (5 x 5 x 5 m) each containing 90 fish. The fish were fed, in triplicate net pens, either a commercially-relevant reference diet (REF) with a combination of fish meal, soy protein concentrate, pea protein concentrate, corn gluten and wheat gluten as the protein source, or an insect meal diet (IM) wherein all the fish meal and most of the pea protein concentrate were replaced by black soldier fly larvae meal. Fish were fed by hand until apparent satiation once or twice daily depending on the duration of the duration of daylight. During the feeding trial, the water temperature ranged from 7 °C to 13 °C. Further details on the formulation and chemical composition of the diets, and insect meal has been reported elsewhere (31, 32).

At the termination of the feeding trial, 6 fish were randomly taken from each net pen, anesthetized with tricaine methanesulfonate (MS222®; Argent Chemical Laboratories, Redmond, WA, USA) and euthanized by a sharp blow to the head. After cleaning the exterior of each fish with 70% ethanol, the distal intestine, i.e., the segment from the increase in intestinal diameter and the appearance of transverse luminal folds to the anus, was aseptically removed from the abdominal cavity, placed in a sterile Petri dish and opened longitudinally. Only fish with digesta along the whole intestine were sampled to ensure that the intestine had been exposed to the diets. The intestinal digesta was collected

---

into a 50 mL skirted sterile centrifuge tube and mixed thoroughly using a spatula. An aliquot of the homogenate was then transferred into a 1.5 mL sterile Eppendorf tube and snap-frozen in liquid N<sub>2</sub> for the profiling of digesta-associated intestinal microbiota. A tissue section from the mid part of the distal intestine was excised and rinsed in sterile phosphate-buffered saline 3 times to remove traces of the remaining digesta. After rinsing, the intestinal tissue was longitudinally cut into 3 pieces for histological evaluation (fixed in 4% phosphate-buffered formaldehyde solution for 24 h and transferred to 70% ethanol for storage), RNA extraction (preserved in RNeasy lysis solution and stored at -20 °C) and profiling of mucosa-associated intestinal microbiota (snap-frozen in liquid N<sub>2</sub>), respectively. The collection of microbiota samples was performed near a gas burner to secure aseptic conditions. After the sampling of each fish, tools were cleaned and decontaminated by an 70% ethanol spray and flaming. Microbiota samples of the distal intestine digesta (DID) and mucosa (DIM) were transported in dry ice and stored at -80 °C until DNA extraction.

## **DNA extraction**

Total DNA was extracted from ~200 mg distal intestine digesta or mucosa using the QIAamp® DNA Stool Mini Kit (Qiagen, Hilden, Germany; catalog no., 51504) with some modifications to the manufacturer's specifications as described before (19), except that 2 mL prefilled bead tubes (Qiagen; catalog no., 13118-50) were used for the bead beating. For quality control purposes, a companion "blank extraction" sample was added to each batch of sample DNA extraction by omitting the input material, whereas an additional microbial community standard (ZymoBIOMICS™, Zymo Research, California, USA;

catalog no., D6300), i.e. mock, was included for each DNA extraction kit as a positive control. The mock consists of 8 bacteria (*Pseudomonas aeruginosa*, *Escherichia coli*, *Salmonella enterica*, *Lactobacillus fermentum*, *Enterococcus faecalis*, *Staphylococcus aureus*, *Listeria monocytogenes*, *Bacillus subtilis*) and 2 yeasts (*Saccharomyces cerevisiae*, *Cryptococcus neoformans*).

## Amplicon PCR

The V1-2 hypervariable regions of the bacterial 16S rRNA gene were amplified using the primer set 27F (5'-AGA GTT TGA TCM TGG CTC AG-3') and 338R (5'-GCW GCC WCC CGT AGG WGT-3') (99). The PCR was run in a total reaction volume of 25 µL containing 12.5 µL of Phusion® High-Fidelity PCR Master Mix (Thermo Scientific, CA, USA; catalog no., F531L), 10.9 µL molecular grade H<sub>2</sub>O, 1 µL DNA template and 0.3 µL of each primer (10 µM). The amplification program was set as follows: initial denaturation at 98 °C for 3 min; 35 cycles of denaturation at 98 °C for 15 s, annealing decreasing from 63 °C to 53 °C in 10 cycles for 30 s followed by 25 cycles at 53 °C for 30 s, and extension at 72 °C for 30 s; followed by a final extension at 72 °C for 10 min. For samples with faint or invisible bands in the agarose gel after PCR, the PCR condition was optimized by applying serial dilutions to the DNA templates to reduce the influence of PCR inhibitors. All the digesta samples were diluted 1:2 in buffer ATE (10 mM Tris-Cl, pH 8.3, with 0.1 mM EDTA and 0.04% NaN<sub>3</sub>) whereas all the mucosa samples were diluted 1:32. The formal amplicon PCR was run in duplicate incorporating two negative PCR controls, which were generated by replacing the template DNA with molecular grade H<sub>2</sub>O. The duplicate PCR products were then pooled and examined by a 1.5% agarose gel

electrophoresis.

## Quantification of 16S rRNA gene by qPCR

To assist in identifying contaminating sequences, the 16S rRNA gene quantity in the diluted DNA templates used for the amplicon PCR was measured by qPCR. The qPCR assays were performed using a universal primer set (forward, 5'-CCA TGA AGT CGG AAT CGC TAG-3'; reverse, 5'-GCT TGA CGG GCG GTG T-3') that has been used for bacterial DNA quantification in previous studies (100, 101). The assays were carried out using the LightCycler 96 (Roche Applied Science, Basel, Switzerland) in a 10 µL reaction volume, which contained 2 µL of PCR-grade water, 1 µL diluted DNA template, 5 µL LightCycler 480 SYBR Green I Master Mix (Roche Applied Science) and 1 µL (3 µM) of each primer. Samples, together with the extraction blanks and mock, were run in duplicate in addition to Femto<sup>TM</sup> bacterial DNA standards (Zymo Research; catalog no., E2006) and a no-template control of the qPCR assay. The qPCR program encompassed an initial enzyme activation step at 95 °C for 2 min, 45 three-step cycles of 95 °C for 10 s, 60 °C for 30 s and 72 °C for 15 s, and a melting curve analysis at the end. Quantification cycle (Cq) values were determined using the second derivative method (102). The specificity of qPCR amplification was confirmed by evaluating the melting curve of qPCR products and the band pattern on the agarose gel after electrophoresis. The inter-plate calibration factor was calculated following the method described in (103), using the bacterial DNA standards as inter-plate calibrators.

## Sequencing

The sequencing was carried out on a Miseq platform following the Illumina 16S



---

metagenomic sequencing library preparation protocol (104). Briefly, the PCR products were cleaned using the Agencourt AMPure XP system (Beckman Coulter, Indiana, USA; catalog no., A63881), multiplexed by dual indexing using the Nextera XT Index Kit (Illumina, California, USA; catalog no., FC-131-1096) and purified again using the AMPure beads. After the second clean-up, representative libraries were selected and analyzed using the Agilent DNA 1000 Kit (Agilent Technologies, California, USA; catalog no., 5067-1505) to verify the library size. Cleaned libraries were quantified using the Invitrogen Qubit™ dsDNA HS Assay Kit (Thermo Fisher Scientific, California, USA; catalog no., Q32854), diluted to 4 nM in 10 mM Tris (pH 8.5) and finally pooled in an equal volume. Negative controls with library concentrations lower than 4 nM were pooled in equal volume directly. Due to the low diversity of amplicon library, 15% Illumina generated PhiX control (catalog no., FC-110-3001) was spiked in by combining 510 µL amplicon library with 90 µL PhiX control library. The library was loaded at 6 pM and sequenced using the Miseq Reagent Kit v3 (600-cycle) (Illumina; catalog no., MS-102-3003).

## Sequence data processing

The raw sequence data were processed by the DADA2 1.14 in R 3.6.3 (105) to infer amplicon sequence variants (ASVs) (106). Specifically, the demultiplexed paired-ended reads were trimmed off the primer sequences (forward reads, first 20 bps; reverse reads, first 18 bps), truncated at the position where the median Phred quality score crashed (forward reads, at position 290 bp; reverse reads, at position 248 bp) and filtered off low-quality reads. After trimming and filtering, the run-specific error rates were estimated and

---

the ASVs were inferred by pooling reads from all the samples sequenced in the same run. The chimeras were removed using the “pooled” method after merging the reads. The resulting raw ASV table and representative sequences were imported into QIIME2 (version, 2020.2) (107). The taxonomy was assigned by a scikit-learn naive Bayes machine-learning classifier (108), which was trained on the SILVA 132 99% OTUs (109) that were trimmed to only include the regions of 16S rRNA gene amplified by our primers. Taxa identified as chloroplasts or mitochondria were excluded from the ASV table. The ASV table was conservatively filtered to remove ASVs that had no phylum-level taxonomic assignment or appeared in only one biological sample. Contaminating ASVs were identified based on two suggested criteria: contaminants are often found in negative controls and inversely correlate with sample DNA concentration (84). The ASVs filtered from the raw ASV table were also removed from the representative sequences, which were then inserted into a reference phylogenetic tree built on the SILVA 128 database using SEPP (110). The alpha rarefaction curves and the core metrics results were generated with a sampling depth of 10000 and 2047 sequences per sample, respectively. For downstream data analysis and visualization, QIIME2 artifacts were imported into R using the *qiime2R* package (111) and a *phyloseq* (112) object was assembled from the sample metadata, ASV table, taxonomy and phylogenetic tree. The core microbiota and alpha-diversity indices were computed using the ASV table collapsed at the species level. The core microbiota was calculated based on the 80% prevalence threshold and visualized by the Venn’s diagram. The alpha-diversity indices, including observed species, Pielou’s evenness, Shannon’s index and Faith’s phylogenetic diversity (PD), were computed via

---

the R packages *microbiome* (113) and *picante* (114). For beta-diversity analyses, we used distance matrices including Jaccard distance, unweighted UniFrac distance, Aitchison distance and phylogenetic isometric log-ratio (PHILR) transformed Euclidean distance. Since rarefying remains to be the best solution for unweighted distance matrices (115), the Jaccard distance and unweighted UniFrac distance were computed in QIIME2 using the rarefied ASV table. The compositionality-aware distance matrices, Aitchison distance and PHILR transformed Euclidean distance, were calculated using the unrarefied ASV table. The Aitchison distance was computed by the *DEICODE* plugin in QIIME2, a form of Aitchison distance that is robust to high levels of sparsity by using the matrix completion to handle the excessive zeros in the microbiome data (116). The PHILR transform of the ASV table was performed in R using the *phylr* package (117). The selected distance matrices were explored and visualized by the principal coordinates analysis (PCoA).

## **Multivariate association analysis**

The ASV table was collapsed at the genus level before running the multivariate association analysis. Bacterial taxa of very low abundance (< 0.01%) or low prevalence (present in < 25% of samples) were removed from the feature table. The microbial clades were then tested for significant associations with metadata of interest by MaAsLin2 (version, 0.99.12) (<https://huttenhower.sph.harvard.edu/maaslin2>) in R, using the default parameters. The results of the analysis are the associations of specific microbial clades with metadata, deconfounding the influence of other factors included in the model. Association was considered significant when the *q*-value was below 0.25. Metadata

included in the multivariate association testing are fixed factors Diet + Sample origin + distal intestine somatic index (DISI) + lamina propria cellularity (histological scores) + immune response (qPCR) + barrier function (qPCR), and random factors FishID + NetPen. FishID was nested in NetPen, and NetPen nested in Diet. Lamina propria cellularity reflects the severity of inflammation in the distal intestine. Based on the degree of cellular infiltration within the lamina propria, a value of normal, mild, moderate, marked or severe was assigned. To make the data appropriate for the association testing, the highly skewed five-category scores were collapsed into more balanced binary data, i.e., normal and abnormal. The immune-related genes included for the association testing were myeloid differentiation factor 88 (*myd88*), interleukin 1 $\beta$  (*il1 $\beta$* ), interleukin 8 (*il8*), cluster of differentiation 3  $\gamma\delta$  (*cd3 $\gamma\delta$* ), transforming growth factor  $\beta$ 1 (*tgf $\beta$ 1*), interferon  $\gamma$  (*ifn $\gamma$* ), interleukin 17A (*il17a*), fork-head box P3 (*foxp3*) and interleukin 10 (*il10*), whose expression levels were higher in the distal intestine of fish assigned abnormal regarding lamina propria cellularity. Since the expression levels of immune-related genes were highly correlated, we ran a principal component analysis (PCA) and extracted the first principle component (PC1) for the association testing to avoid multicollinearity and reduce the number of association testing. For genes relevant to the barrier function, which included claudin-15 (*cldn15*), claudin-25b (*cldn25b*), zonula occludens 1 (*zol*), E-cadherin / cadherin 1 (*cdh1*) and mucin-2 (*muc2*), we also used the PC1 of the PCA for the association testing based on the same considerations.

## Statistics

All the statistical analyses were run in R except for the PERMANOVA, which was

---

run in PRIMER v7. The differences in the alpha-diversity indices were compared using linear mixed-effects models via the *lme4* package (118). Predictor variables in the models included the fixed effects Diet + Sample origin + Diet x Sample origin, and the random effects FishID + NetPen. The models were validated by visual inspections of residual diagnostic plots generated by the *ggResidpanel* package (119). The statistical significance of fixed predictors was estimated by Type III ANOVA with Kenward-Roger's approximation of denominator degrees of freedom via the *lmerTest* package (120). When the interaction between the main effects was significant, conditional contrasts for the main effects were made via the *emmeans* package (121). To compare the differences in beta-diversity, we performed the PERMANOVA (122) using the same predictors included in the linear mixed-effects models. Terms with negative estimates for components of variation were sequentially removed from the model via term pooling, starting with the one showing the smallest mean squares. At each step, the model was reassessed whether more terms need to be removed or not. Conditional contrasts for the main effects were constructed when their interaction was significant. Monte Carlo *p* values were computed as well when the unique permutations for the terms in the PERMANOVA were small (< 100). The homogeneity of multivariate dispersions among groups was visually assessed with boxplots and was formally tested by the permutation test, PERMDISP (123), via the R package *vegan* (124). Multiple comparisons were adjusted by the Benjamini-Hochberg procedure where applicable. Differences were regarded as significant when  $p < 0.05$ .

## Code availability

All the code for reproducing the results are available from the GitHub repository

([https://github.com/yanxianl/Li\\_AqFl2-Microbiota\\_ASM\\_2020](https://github.com/yanxianl/Li_AqFl2-Microbiota_ASM_2020)).

## Data availability

Raw sequence data are deposited at the NCBI SRA database (<https://www.ncbi.nlm.nih.gov/sra>) under the BioProject PRJNA555355. Other raw data and sample metadata are available from the GitHub repository ([https://github.com/yanxianl/Li\\_AqFl2-Microbiota\\_ASM\\_2020](https://github.com/yanxianl/Li_AqFl2-Microbiota_ASM_2020)).

## ACKNOWLEDGMENTS

Y.L. was granted a scholarship from the China Scholarship Council to pursue his PhD degree at Norwegian University of Life Sciences. This work was a spin-off of the “AquaFly” project (grant number, 238997), funded by the Research Council of Norway and managed by the Institute of Marine Research. Costs related to this study were covered by Norwegian University of Life Sciences. The funding agencies had no role in study design, data collection and interpretation, decision to publish or preparation of the manuscript.

The authors wish to thank Ellen K. Hage for organizing the sampling and technicians at the GIFAS for their committed animal care and supports during the sampling.

T.M.K. and Å.K. conceived and designed the study. Y.L., L.B. and K.G. participated in the sample collection. Y.L., L.B. and A.J.-T. carried out the laboratory works. Y.L. performed the bioinformatics, statistical analyses and data visualization. Y.L. and L.B. completed the first draft of the manuscript. All the authors read, revised and approved the final version of the manuscript.

We declare no conflicts of interest.

## REFERENCE

1. Ray A, Ghosh K, Ringø E. 2012. Enzyme-producing bacteria isolated from fish gut: a review. *Aquac Nutr* 18:465-492.
2. Falcinelli S, Picchiatti S, Rodiles A, Cossignani L, Merrifield DL, Taddei AR, Maradonna F, Olivotto I, Gioacchini G, Carnevali O. 2015. *Lactobacillus rhamnosus* lowers zebrafish lipid content by changing gut microbiota and host transcription of genes involved in lipid metabolism. *Sci Rep* 5:9336.
3. Semova I, Carten JD, Stombaugh J, Mackey LC, Knight R, Farber SA, Rawls JF. 2012. Microbiota regulate intestinal absorption and metabolism of fatty acids in the zebrafish. *Cell Host Microbe* 12:277-288.
4. Lyte M, Cryan JF. 2014. Microbial endocrinology: the microbiota-gut-brain axis in health and disease, vol 817. Springer.
5. Jeon SR, Chai J, Kim C, Lee CH. 2018. Current evidence for the management of inflammatory bowel diseases using fecal microbiota transplantation. *Curr Infect Dis Rep* 20:21.
6. Frank DN, St Amand AL, Feldman RA, Boedeker EC, Harpaz N, Pace NR. 2007. Molecular-phylogenetic characterization of microbial community imbalances in human inflammatory bowel diseases. *Proc Natl Acad Sci U S A* 104:13780-5.
7. Manichanh C, Rigottier-Gois L, Bonnaud E, Gloux K, Pelletier E, Frangeul L, Nalin R, Jarrin C, Chardon P, Marteau P. 2006. Reduced diversity of faecal

- 
- 661 microbiota in Crohn's disease revealed by a metagenomic approach. *Gut* 55:205-  
662 211.
- 663 8. Narula N, Kassam Z, Yuan Y, Colombel JF, Ponsioen C, Reinisch W, Moayyedi P.  
664 2017. Systematic review and meta-analysis: fecal microbiota transplantation for  
665 treatment of active ulcerative colitis. *Inflamm Bowel Dis* 23:1702-1709.
- 666 9. Wu GD, Chen J, Hoffmann C, Bittinger K, Chen YY, Keilbaugh SA, Bewtra M,  
667 Knights D, Walters WA, Knight R, Sinha R, Gilroy E, Gupta K, Baldassano R,  
668 Nessel L, Li H, Bushman FD, Lewis JD. 2011. Linking long-term dietary patterns  
669 with gut microbial enterotypes. *Science* 334:105-8.
- 670 10. Muegge BD, Kuczynski J, Knights D, Clemente JC, González A, Fontana L,  
671 Henrissat B, Knight R, Gordon JI. 2011. Diet drives convergence in gut  
672 microbiome functions across mammalian phylogeny and within humans. *Science*  
673 332:970-974.
- 674 11. De Filippo C, Cavalieri D, Di Paola M, Ramazzotti M, Poullet JB, Massart S,  
675 Collini S, Pieraccini G, Lionetti P. 2010. Impact of diet in shaping gut microbiota  
676 revealed by a comparative study in children from Europe and rural Africa. *Proc*  
677 *Natl Acad Sci U S A* 107:14691-6.
- 678 12. David LA, Maurice CF, Carmody RN, Gootenberg DB, Button JE, Wolfe BE,  
679 Ling AV, Devlin AS, Varma Y, Fischbach MA, Biddinger SB, Dutton RJ,  
680 Turnbaugh PJ. 2014. Diet rapidly and reproducibly alters the human gut  
681 microbiome. *Nature* 505:559-63.
- 682 13. Wang Z, Klipfell E, Bennett BJ, Koeth R, Levison BS, Dugar B, Feldstein AE,



- 
- Britt EB, Fu X, Chung YM, Wu Y, Schauer P, Smith JD, Allayee H, Tang WH, DiDonato JA, Lusis AJ, Hazen SL. 2011. Gut flora metabolism of phosphatidylcholine promotes cardiovascular disease. *Nature* 472:57-63.
14. Hryckowian AJ, Van Treuren W, Smits SA, Davis NM, Gardner JO, Bouley DM, Sonnenburg JL. 2018. Microbiota-accessible carbohydrates suppress *Clostridium difficile* infection in a murine model. *Nat Microbiol* 3:662-669.
15. FAO. 2018. The State of World Fisheries and Aquaculture. FAO, Rome, Italy.
16. Aas TS, Ytrestøyl T, Åsgård T. 2019. Utilization of feed resources in the production of Atlantic salmon (*Salmo salar*) in Norway: An update for 2016. *Aquac Rep* 15:100216.
17. Sánchez-Muros M-J, Barroso FG, Manzano-Agugliaro F. 2014. Insect meal as renewable source of food for animal feeding: a review. *J Clean Prod* 65:16-27.
18. Øverland M, Skrede A. 2016. Yeast derived from lignocellulosic biomass as a sustainable feed resource for use in aquaculture. *J Sci Food Agric* 97:733-742.
19. Gajardo K, Jaramillo-Torres A, Kortner TM, Merrifield DL, Tinsley J, Bakke AM, Kroghdahl Å. 2017. Alternative protein sources in the diet modulate microbiota and functionality in the distal intestine of Atlantic salmon (*Salmo salar*). *Appl Environ Microbiol* 83:e02615-16.
20. Jin Y, Angell IL, Rod Sandve S, Snipen LG, Olsen Y, Rudi K. 2019. Atlantic salmon raised with diets low in long-chain polyunsaturated n-3 fatty acids in freshwater have a *Mycoplasma*-dominated gut microbiota at sea. *Aquac Environ Interact* 11:31-39.

- 
- 705 21. Schmidt V, Amaral-Zettler L, Davidson J, Summerfelt S, Good C. 2016. Influence  
706 of fishmeal-free diets on microbial communities in Atlantic salmon (*Salmo salar*)  
707 recirculation aquaculture systems. Appl Environ Microbiol 82:4470-4481.
- 708 22. Eckburg PB, Bik EM, Bernstein CN, Purdom E, Dethlefsen L, Sargent M, Gill  
709 SR, Nelson KE, Relman DA. 2005. Diversity of the human intestinal microbial  
710 flora. Science 308:1635-8.
- 711 23. Gajardo K, Rodiles A, Kortner TM, Krogdahl Å, Bakke AM, Merrifield DL,  
712 Sorum H. 2016. A high-resolution map of the gut microbiota in Atlantic salmon  
713 (*Salmo salar*): A basis for comparative gut microbial research. Sci Rep 6:30893.
- 714 24. Looft T, Allen HK, Cantarel BL, Levine UY, Bayles DO, Alt DP, Henrissat B,  
715 Stanton TB. 2014. Bacteria, phages and pigs: the effects of in-feed antibiotics on  
716 the microbiome at different gut locations. ISME J 8:1566.
- 717 25. Lyons PP, Turnbull JF, Dawson KA, Crumlish M. 2017. Exploring the microbial  
718 diversity of the distal intestinal lumen and mucosa of farmed rainbow trout  
719 *Oncorhynchus mykiss* (Walbaum) using next generation sequencing (NGS).  
720 Aquac Res 48:77-91.
- 721 26. Huyben D, Sun L, Moccia R, Kiessling A, Dicksved J, Lundh T. 2018. Dietary  
722 live yeast and increased water temperature influence the gut microbiota of  
723 rainbow trout. J Appl Microbiol 124:1377-1392.
- 724 27. Jaramillo-Torres A, Rawling MD, Rodiles A, Mikalsen HE, Johansen LH, Tinsley  
725 J, Forberg T, Aasum E, Castex M, Merrifield DL. 2019. Influence of Dietary  
726 Supplementation of Probiotic *Pediococcus acidilactici* MA18/5M During the

- 
- 727 Transition From Freshwater to Seawater on Intestinal Health and Microbiota of  
728 Atlantic Salmon (*Salmo salar* L.). Front Microbiol 10:2243.
- 729 28. Rimoldi S, Gini E, Iannini F, Gasco L, Terova G. 2019. The effects of dietary  
730 insect meal from *Hermetia illucens* prepupae on autochthonous gut microbiota of  
731 rainbow trout (*Oncorhynchus mykiss*). Animals (Basel) 9.
- 732 29. Terova G, Rimoldi S, Ascione C, Gini E, Ceccotti C, Gasco L. 2019. Rainbow  
733 trout (*Oncorhynchus mykiss*) gut microbiota is modulated by insect meal from  
734 *Hermetia illucens* prepupae in the diet. Rev Fish Biol Fish 29:465-486.
- 735 30. Bruni L, Belghit I, Lock EJ, Secci G, Taiti C, Parisi GA. 2020. Total replacement  
736 of dietary fish meal with black soldier fly (*Hermetia illucens*) larvae does not  
737 impair physical, chemical or volatile composition of farmed Atlantic salmon  
738 (*Salmo salar* L.). J Sci Food Agric 100:1038-1047.
- 739 31. Li Y, Kortner TM, Chikwati EM, Belghit I, Lock E-J, Krogdahl Å. 2020. Total  
740 replacement of fish meal with black soldier fly (*Hermetia illucens*) larvae meal  
741 does not compromise the gut health of Atlantic salmon (*Salmo salar*). Aquaculture  
742 520:734967.
- 743 32. Belghit I, Liland NS, Gjesdal P, Biancarosa I, Menchetti E, Li Y, Waagbø R,  
744 Krogdahl Å, Lock E-J. 2019. Black soldier fly larvae meal can replace fish meal  
745 in diets of sea-water phase Atlantic salmon (*Salmo salar*). Aquaculture 503:609-  
746 619.
- 747 33. Dehler CE, Secombes CJ, Martin SA. 2017. Seawater transfer alters the intestinal  
748 microbiota profiles of Atlantic salmon (*Salmo salar* L.). Sci Rep 7:13877.

- 
- 749 34. Dehler CE, Secombes CJ, Martin SAM. 2017. Environmental and physiological  
750 factors shape the gut microbiota of Atlantic salmon parr (*Salmo salar* L.).  
751 Aquaculture 467:149-157.
- 752 35. Gupta S, Feckaninova A, Lokesh J, Koscova J, Sorensen M, Femandes J, Kiron  
753 V. 2019. *Lactobacillus* dominate in the intestine of Atlantic salmon fed dietary  
754 probiotics. Front Microbiol 9.
- 755 36. Gupta S, Lokesh J, Abdelhafiz Y, Siriyappagounder P, Pierre R, Sorensen M,  
756 Fernandes JMO, Kiron V. 2019. Macroalga-derived alginate oligosaccharide  
757 alters intestinal bacteria of Atlantic salmon. Front Microbiol 10.
- 758 37. Llewellyn MS, McGinnity P, Dionne M, Letourneau J, Thonier F, Carvalho GR,  
759 Creer S, Derome N. 2015. The biogeography of the Atlantic salmon (*Salmo salar*)  
760 gut microbiome. ISME J 10:1280-1284.
- 761 38. Webster TMU, Consuegra S, Hitchings M, de Leaniz CG. 2018. Interpopulation  
762 variation in the Atlantic salmon microbiome reflects environmental and genetic  
763 diversity. Appl Environ Microbiol 84:e00691-18.
- 764 39. Fogarty C, Burgess CM, Cotter PD, Cabrera-Rubio R, Whyte P, Smyth C, Bolton  
765 DJ. 2019. Diversity and composition of the gut microbiota of Atlantic salmon  
766 (*Salmo salar*) farmed in Irish waters. J Appl Microbiol 127:648-657.
- 767 40. Godoy FA, Miranda CD, Wittwer GD, Aranda CP, Calderon R. 2015. High  
768 variability of levels of *Aliivibrio* and lactic acid bacteria in the intestinal  
769 microbiota of farmed Atlantic salmon *Salmo salar* L. Ann Microbiol 65:2343-  
770 2353.

- 
- 771 41. Karlsen C, Ottem K, Brevik ØJ, Davey M, Sørum H, Winther-Larsen H. 2017.  
772 The environmental and host-associated bacterial microbiota of Arctic seawater-  
773 farmed Atlantic salmon with ulcerative disorders. J Fish Dis 40:1645-1663.
- 774 42. Zarkasi KZ, Abell GCJ, Taylor RS, Neuman C, Hatje E, Tamplin ML, Katouli M,  
775 Bowman JP. 2014. Pyrosequencing-based characterization of gastrointestinal  
776 bacteria of Atlantic salmon (*Salmo salar* L.) within a commercial mariculture  
777 system. J Appl Microbiol 117:18-27.
- 778 43. Zarkasi KZ, Taylor RS, Abell GC, Tamplin ML, Glencross BD, Bowman JP. 2016.  
779 Atlantic salmon (*Salmo salar* L.) gastrointestinal microbial community dynamics  
780 in relation to digesta properties and diet. Microb Ecol 71:589-603.
- 781 44. Urbanczyk H, Ast JC, Higgins MJ, Carson J, Dunlap PV. 2007. Reclassification  
782 of *Vibrio fischeri*, *Vibrio logei*, *Vibrio salmonicida* and *Vibrio wodanis* as  
783 *Aliivibrio fischeri* gen. nov., comb. nov., *Aliivibrio logei* comb. nov., *Aliivibrio*  
784 *salmonicida* comb. nov. and *Aliivibrio wodanis* comb. nov. Int J Syst Evol  
785 Microbiol 57:2823-2829.
- 786 45. Dunlap PV, Ast JC, Kimura S, Fukui A, Yoshino T, Endo H. 2007. Phylogenetic  
787 analysis of host-symbiont specificity and codivergence in bioluminescent  
788 symbioses. Cladistics 23:507-532.
- 789 46. Egidius E, Wiik R, Andersen K, Hoff K, Hjeltne B. 1986. *Vibrio salmonicida* sp.  
790 nov., a new fish pathogen. Int J Syst Evol Microbiol 36:518-520.
- 791 47. Lunder T, Sørum H, Holstad G, Steigerwalt AG, Mowinckel P, Brenner DJ. 2000.  
792 Phenotypic and genotypic characterization of *Vibrio viscosus* sp. nov. and *Vibrio*

- 
- 793            *wodanis* sp. nov. isolated from Atlantic salmon (*Salmo salar*) with 'winter ulcer'.  
794            Int J Syst Evol Microbiol 50:427-450.
- 795    48.    Anderson JF, Johnson RC, Magnarelli LA, Hyde FW, Andreadis TG. 1987. New  
796            infectious spirochete isolated from short-tailed shrews and white-footed mice. J  
797            Clin Microbiol 25:1490-4.
- 798    49.    Brown RM, Wiens GD, Salinas I. 2019. Analysis of the gut and gill microbiome  
799            of resistant and susceptible lines of rainbow trout (*Oncorhynchus mykiss*). Fish  
800            Shellfish Immunol 86:497-506.
- 801    50.    Tapia-Paniagua S, Vidal S, Lobo C, Prieto-Álamo M, Jurado J, Cordero H,  
802            Cerezuela R, de la Banda IG, Esteban M, Balebona M. 2014. The treatment with  
803            the probiotic *Shewanella putrefaciens* Pdp11 of specimens of *Solea senegalensis*  
804            exposed to high stocking densities to enhance their resistance to disease. Fish  
805            Shellfish Immunol 41:209-221.
- 806    51.    Holben W, Williams P, Saarinen M, Särkilahti L, Apajalahti J. 2002. Phylogenetic  
807            analysis of intestinal microflora indicates a novel *Mycoplasma* phylotype in  
808            farmed and wild salmon. Microb Ecol 44:175-185.
- 809    52.    Razin S, Yogev D, Naot Y. 1998. Molecular biology and pathogenicity of  
810            mycoplasmas. Microbiol Mol Biol Rev 62:1094-156.
- 811    53.    Pollack JD, Williams MV, McElhaney RN. 1997. The comparative metabolism of  
812            the mollicutes (*Mycoplasmas*): the utility for taxonomic classification and the  
813            relationship of putative gene annotation and phylogeny to enzymatic function in  
814            the smallest free-living cells. Crit Rev Microbiol 23:269-354.

- 
- 815 54. Van den Abbeele P, Van de Wiele T, Verstraete W, Possemiers S. 2011. The host  
816 selects mucosal and luminal associations of coevolved gut microorganisms: a  
817 novel concept. FEMS Microbiol Rev 35:681-704.
- 818 55. Kennedy M, Rosnick D, Ulrich R, Yancey Jr R. 1988. Association of *Treponema*  
819 *hyodysenteriae* with porcine intestinal mucosa. J Gen Microbiol 134:1565-1576.
- 820 56. Milner J, Sellwood R. 1994. Chemotactic response to mucin by *Serpulina*  
821 *hyodysenteriae* and other porcine spirochetes: potential role in intestinal  
822 colonization. Infect Immun 62:4095-4099.
- 823 57. Witters NA, Duhamel GE. 1999. Motility-regulated mucin association of  
824 *Serpulina pilosicoli*, the agent of colonic spirochetosis of humans and animals, p  
825 199-205, Advances in Experimental Medicine and Biology, vol 473. Springer.
- 826 58. Bruni L, Pastorelli R, Viti C, Gasco L, Parisi G. 2018. Characterisation of the  
827 intestinal microbial communities of rainbow trout (*Oncorhynchus mykiss*) fed  
828 with *Hermetia illucens* (black soldier fly) partially defatted larva meal as partial  
829 dietary protein source. Aquaculture 487:56-63.
- 830 59. Huyben D, Vidaković A, Hallgren SW, Langeland M. 2019. High-throughput  
831 sequencing of gut microbiota in rainbow trout (*Oncorhynchus mykiss*) fed larval  
832 and pre-pupae stages of black soldier fly (*Hermetia illucens*). Aquaculture  
833 500:485-491.
- 834 60. Borrelli L, Coretti L, Dipineto L, Bovera F, Menna F, Chiariotti L, Nizza A,  
835 Lembo F, Fioretti A. 2017. Insect-based diet, a promising nutritional source,  
836 modulates gut microbiota composition and SCFAs production in laying hens. Sci

- 
- 837 Rep 7:1-11.
- 838 61. Kawasaki K, Hashimoto Y, Hori A, Kawasaki T, Hirayasu H, Iwase S, Hashizume  
839 A, Ido A, Miura C, Miura T, Nakamura S, Seyama T, Matsumoto Y, Kasai K,  
840 Fujitani Y. 2019. Evaluation of black soldier fly (*Hermetia illucens*) larvae and  
841 pre-pupae raised on household organic waste, as potential ingredients for poultry  
842 feed. *Animals* (Basel) 9.
- 843 62. Jozefiak A, Nogales-Merida S, Mikolajczak Z, Rawski M, Kieronczyk B,  
844 Mazurkiewicz J. 2019. The utilization of full-fat insect meal in rainbow trout  
845 (*oncorhynchus mykiss*) nutrition: The effects on growth performance, intestinal  
846 microbiota and gastrointestinal tract histomorphology. *Ann Anim Sci* 19:747-765.
- 847 63. Jozefiak A, Nogales-Merida S, Rawski M, Kieronczyk B, Mazurkiewicz J. 2019.  
848 Effects of insect diets on the gastrointestinal tract health and growth performance  
849 of Siberian sturgeon (*Acipenser baerii* Brandt, 1869). *BMC Microbiol* 15.
- 850 64. Jiang CL, Jin WZ, Tao XH, Zhang Q, Zhu J, Feng SY, Xu XH, Li HY, Wang ZH,  
851 Zhang ZJ. 2019. Black soldier fly larvae (*Hermetia illucens*) strengthen the  
852 metabolic function of food waste biodegradation by gut microbiome. *Microb*  
853 *Biotechnol* 12:528-543.
- 854 65. Bruno D, Bonelli M, De Filippis F, Di Lelio I, Tettamanti G, Casartelli M, Ercolini  
855 D, Caccia S. 2019. The intestinal microbiota of *Hermetia illucens* larvae is  
856 affected by diet and shows a diverse composition in the different midgut regions.  
857 *Appl Environ Microbiol* 85:e01864-18.
- 858 66. Wynants E, Frooninckx L, Crauwels S, Verreth C, De Smet J, Sandrock C,



- 
- 859 Wohlfahrt J, Van Schelt J, Depraetere S, Lievens B. 2019. Assessing the  
860 microbiota of black soldier fly larvae (*Hermetia illucens*) reared on organic waste  
861 streams on four different locations at laboratory and large scale. Microb Ecol  
862 77:913-930.
- 863 67. Zheng L, Crippen TL, Singh B, Tarone AM, Dowd S, Yu Z, Wood TK, Tomberlin  
864 JK. 2013. A survey of bacterial diversity from successive life stages of black  
865 soldier fly (Diptera: Stratiomyidae) by using 16S rDNA pyrosequencing. J Med  
866 Entomol 50:647-658.
- 867 68. Emerson JB, Adams RI, Roman CMB, Brooks B, Coil DA, Dahlhausen K, Ganz  
868 HH, Hartmann EM, Hsu T, Justice NB, Paulino-Lima IG, Luongo JC,  
869 Lymperopoulou DS, Gomez-Silvan C, Rothschild-Mancinelli B, Balk M,  
870 Huttenhower C, Nocker A, Vaishampayan P, Rothschild LJ. 2017. Schrodinger's  
871 microbes: Tools for distinguishing the living from the dead in microbial  
872 ecosystems. Microbiome 5:86.
- 873 69. Beier S, Bertilsson S. 2013. Bacterial chitin degradation—mechanisms and  
874 ecophysiological strategies. Front Microbiol 4:149.
- 875 70. Cody R. 1989. Distribution of chitinase and chitobiase in *Bacillus*. Curr Microbiol  
876 19:201-205.
- 877 71. Askarian F, Zhou ZG, Olsen RE, Sperstad S, Ringo E. 2012. Culturable  
878 autochthonous gut bacteria in Atlantic salmon (*Salmo salar* L.) fed diets with or  
879 without chitin. Characterization by 16S rRNA gene sequencing, ability to produce  
880 enzymes and in vitro growth inhibition of four fish pathogens. Aquaculture 326:1-

- 
- 881           8.
- 882   72.   Maynard CL, Elson CO, Hatton RD, Weaver CT. 2012. Reciprocal interactions of  
883           the intestinal microbiota and immune system. *Nature* 489:231-41.
- 884   73.   McLaren MR, Willis AD, Callahan BJ. 2019. Consistent and correctable bias in  
885           metagenomic sequencing experiments. *Elife* 8.
- 886   74.   Brooks JP, Edwards DJ, Harwich MD, Rivera MC, Fettweis JM, Serrano MG,  
887           Reris RA, Sheth NU, Huang B, Girerd P. 2015. The truth about metagenomics:  
888           quantifying and counteracting bias in 16S rRNA studies. *BMC Microbiol* 15:66.
- 889   75.   Sinha R, Abnet CC, White O, Knight R, Huttenhower C. 2015. The microbiome  
890           quality control project: baseline study design and future directions. *Genome Biol*  
891           16:276.
- 892   76.   Costea PI, Zeller G, Sunagawa S, Pelletier E, Alberti A, Levenez F, Tramontano  
893           M, Driessen M, Hercog R, Jung F-E. 2017. Towards standards for human fecal  
894           sample processing in metagenomic studies. *Nat Biotechnol* 35:1069.
- 895   77.   Santiago A, Panda S, Mengels G, Martinez X, Azpiroz F, Dore J, Guarner F,  
896           Manichanh C. 2014. Processing faecal samples: a step forward for standards in  
897           microbial community analysis. *BMC Microbiol* 14:112.
- 898   78.   Lazarevic V, Gaia N, Girard M, Schrenzel J. 2016. Decontamination of 16S rRNA  
899           gene amplicon sequence datasets based on bacterial load assessment by qPCR.  
900           *BMC Microbiol* 16:73.
- 901   79.   Kim D, Hofstaedter CE, Zhao C, Mattei L, Tanes C, Clarke E, Lauder A, Sherrill-  
902           Mix S, Chehoud C, Kelsen J, Conrad M, Collman RG, Baldassano R, Bushman

---

903 FD, Bittinger K. 2017. Optimizing methods and dodging pitfalls in microbiome  
904 research. *Microbiome* 5:52.

905 80. Jousselin E, Clamens AL, Galan M, Bernard M, Maman S, Gschloessl B, Duport  
906 G, Meseguer AS, Calevro F, Coeur d'acier A. 2016. Assessment of a 16S rRNA  
907 amplicon Illumina sequencing procedure for studying the microbiome of a  
908 symbiont-rich aphid genus. *Mol Ecol Resour* 16:628-40.

909 81. Jost T, Lacroix C, Braegger C, Chassard C. 2013. Assessment of bacterial  
910 diversity in breast milk using culture-dependent and culture-independent  
911 approaches. *Br J Nutr* 110:1253-62.

912 82. Jervis-Bardy J, Leong LEX, Marri S, Smith RJ, Choo JM, Smith-Vaughan HC,  
913 Nosworthy E, Morris PS, O'Leary S, Rogers GB, Marsh RL. 2015. Deriving  
914 accurate microbiota profiles from human samples with low bacterial content  
915 through post-sequencing processing of Illumina MiSeq data. *Microbiome* 3:19.

916 83. Glassing A, Dowd SE, Galandiuk S, Davis B, Chiodini RJ. 2016. Inherent  
917 bacterial DNA contamination of extraction and sequencing reagents may affect  
918 interpretation of microbiota in low bacterial biomass samples. *Gut Pathog* 8:24.

919 84. Davis NM, Proctor DM, Holmes SP, Relman DA, Callahan BJ. 2018. Simple  
920 statistical identification and removal of contaminant sequences in marker-gene  
921 and metagenomics data. *Microbiome* 6:226.

922 85. Salter SJ, Cox MJ, Turek EM, Calus ST, Cookson WO, Moffatt MF, Turner P,  
923 Parkhill J, Loman NJ, Walker AW. 2014. Reagent and laboratory contamination  
924 can critically impact sequence-based microbiome analyses. *BMC Biol* 12:87.

- 
- 925 86. Kulakov LA, McAlister MB, Ogden KL, Larkin MJ, O'Hanlon JF. 2002. Analysis  
926 of bacteria contaminating ultrapure water in industrial systems. Appl Environ  
927 Microbiol 68:1548-55.
- 928 87. Grahn N, Olofsson M, Ellnebo-Svedlund K, Monstein HJ, Jonasson J. 2003.  
929 Identification of mixed bacterial DNA contamination in broad-range PCR  
930 amplification of 16S rDNA V1 and V3 variable regions by pyrosequencing of  
931 cloned amplicons. FEMS Microbiol Lett 219:87-91.
- 932 88. Cantas L, Fraser TWK, Fjelldal PG, Mayer I, Sorum H. 2011. The culturable  
933 intestinal microbiota of triploid and diploid juvenile Atlantic salmon (*Salmo salar*)  
934 - a comparison of composition and drug resistance. BMC Vet Res 7:71.
- 935 89. Navarrete P, Fuentes P, De la Fuente L, Barros L, Magne F, Opazo R, Ibacache C,  
936 Espejo R, Romero J. 2013. Short-term effects of dietary soybean meal and lactic  
937 acid bacteria on the intestinal morphology and microbiota of Atlantic salmon  
938 (*Salmo salar*). Aquac Nutr 19:827-836.
- 939 90. Hatje E, Neuman C, Stevenson H, Bowman JP, Katouli M. 2014. Population  
940 dynamics of *Vibrio* and *Pseudomonas* species isolated from farmed Tasmanian  
941 Atlantic salmon (*Salmo salar* L.): a seasonal study. Microb Ecol 68:679-687.
- 942 91. He XP, Chaganti SR, Heath DD. 2018. Population-specific responses to  
943 interspecific competition in the gut microbiota of two Atlantic salmon (*Salmo*  
944 *salar*) populations. Microb Ecol 75:140-151.
- 945 92. Laurence M, Hatzis C, Brash DE. 2014. Common contaminants in next-  
946 generation sequencing that hinder discovery of low-abundance microbes. PLoS

- 
- 947           One 9:e97876.
- 948   93.    Lauder AP, Roche AM, Sherrill-Mix S, Bailey A, Laughlin AL, Bittinger K, Leite  
949           R, Elovitz MA, Parry S, Bushman FD. 2016. Comparison of placenta samples  
950           with contamination controls does not provide evidence for a distinct placenta  
951           microbiota. *Microbiome* 4:29.
- 952   94.    Barton HA, Taylor NM, Lubbers BR, Pemberton AC. 2006. DNA extraction from  
953           low-biomass carbonate rock: an improved method with reduced contamination  
954           and the low-biomass contaminant database. *J Microbiol Methods* 66:21-31.
- 955   95.    Weyrich LS, Farrer AG, Eisenhofer R, Arriola LA, Young J, Selway CA,  
956           Handsley-Davis M, Adler CJ, Breen J, Cooper A. 2019. Laboratory contamination  
957           over time during low-biomass sample analysis. *Mol Ecol Resour* 19:982-996.
- 958   96.    Tanner MA, Goebel BM, Dojka MA, Pace NR. 1998. Specific ribosomal DNA  
959           sequences from diverse environmental settings correlate with experimental  
960           contaminants. *Appl Environ Microbiol* 64:3110-3.
- 961   97.    Eisenhofer R, Minich JJ, Marotz C, Cooper A, Knight R, Weyrich LS. 2019.  
962           Contamination in low microbial biomass microbiome studies: issues and  
963           recommendations. *Trends Microbiol* 27:105-117.
- 964   98.    de Goffau MC, Lager S, Salter SJ, Wagner J, Kronbichler A, Charnock-Jones DS,  
965           Peacock SJ, Smith GCS, Parkhill J. 2018. Recognizing the reagent microbiome.  
966           *Nat Microbiol* 3:851-853.
- 967   99.    Roeselers G, Mittge EK, Stephens WZ, Parichy DM, Cavanaugh CM, Guillemin  
968           K, Rawls JF. 2011. Evidence for a core gut microbiota in the zebrafish. *ISME J*

- 
- 969 5:1595-608.
- 970 100. Vandeputte D, Kathagen G, D'Hoe K, Vieira-Silva S, Valles-Colomer M, Sabino  
971 J, Wang J, Tito RY, De Commer L, Darzi Y, Vermeire S, Falony G, Raes J. 2017.  
972 Quantitative microbiome profiling links gut community variation to microbial  
973 load. *Nature* 551:507-511.
- 974 101. Ramseier CA, Kinney JS, Herr AE, Braun T, Sugai JV, Shelburne CA, Rayburn  
975 LA, Tran HM, Singh AK, Giannobile WV. 2009. Identification of pathogen and  
976 host-response markers correlated with periodontal disease. *J Periodontol* 80:436-  
977 46.
- 978 102. Rasmussen R. 2001. Quantification on the LightCycler, p 21-34, Rapid cycle real-  
979 time PCR. Springer.
- 980 103. Hellemans J, Mortier G, De Paepe A, Speleman F, Vandesompele J. 2007. qBase  
981 relative quantification framework and software for management and automated  
982 analysis of real-time quantitative PCR data. *Genome Biol* 8:R19.
- 983 104. Illumina I. 2013. 16S Metagenomic sequencing library preparation. Preparing 16S  
984 Ribosomal RNA Gene Amplicons for the Illumina MiSeq System:1-28.
- 985 105. R Core Team. 2013. R: A language and environment for statistical computing.
- 986 106. Callahan BJ, McMurdie PJ, Rosen MJ, Han AW, Johnson AJA, Holmes SP. 2016.  
987 DADA2: high-resolution sample inference from Illumina amplicon data. *Nat*  
988 *Methods* 13:581-583.
- 989 107. Bolyen E, Rideout JR, Dillon MR, Bokulich NA, Abnet CC, Al-Ghalith GA,  
990 Alexander H, Alm EJ, Arumugam M, Asnicar F, Bai Y, Bisanz JE, Bittinger K,

---

991 Brejnrod A, Brislawn CJ, Brown CT, Callahan BJ, Caraballo-Rodríguez AM,  
992 Chase J, Cope EK, Da Silva R, Diener C, Dorrestein PC, Douglas GM, Durall  
993 DM, Duvallet C, Edwardson CF, Ernst M, Estaki M, Fouquier J, Gauglitz JM,  
994 Gibbons SM, Gibson DL, Gonzalez A, Gorlick K, Guo J, Hillmann B, Holmes S,  
995 Holste H, Huttenhower C, Huttley GA, Janssen S, Jarmusch AK, Jiang L, Kaehler  
996 BD, Kang KB, Keefe CR, Keim P, Kelley ST, Knights D, et al. 2019.  
997 Reproducible, interactive, scalable and extensible microbiome data science using  
998 QIIME 2. Nat Biotechnol 37:852-857.

999 108. Bokulich NA, Kaehler BD, Rideout JR, Dillon M, Bolyen E, Knight R, Huttley  
1000 GA, Caporaso JG. 2018. Optimizing taxonomic classification of marker-gene  
1001 amplicon sequences with QIIME 2's q2-feature-classifier plugin. Microbiome  
1002 6:90.

1003 109. Quast C, Pruesse E, Yilmaz P, Gerken J, Schweer T, Yarza P, Peplies J, Glockner  
1004 FO. 2013. The SILVA ribosomal RNA gene database project: improved data  
1005 processing and web-based tools. Nucleic Acids Res 41:D590-6.

1006 110. Janssen S, McDonald D, Gonzalez A, Navas-Molina JA, Jiang L, Xu ZZ, Winker  
1007 K, Kado DM, Orwoll E, Manary M. 2018. Phylogenetic placement of exact  
1008 amplicon sequences improves associations with clinical information. mSystems  
1009 3:e00021-18.

1010 111. Bisanz JE. 2019. qiime2R: Importing QIIME2 artifacts and associated data into R  
1011 sessions.

1012 112. McMurdie PJ, Holmes S. 2013. phyloseq: an R package for reproducible

---

1013            interactive analysis and graphics of microbiome census data.

1014    113.    Lahti L, Shetty S, Blake T, Salojarvi J. 2017. Microbiome r package. Tools

1015            Microbiome Anal R.

1016    114.    Kembel SW, Cowan PD, Helmus MR, Cornwell WK, Morlon H, Ackerly DD,

1017            Blomberg SP, Webb CO. 2010. Picante: R tools for integrating phylogenies and

1018            ecology. Bioinformatics 26:1463-4.

1019    115.    Weiss S, Xu ZZ, Peddada S, Amir A, Bittinger K, Gonzalez A, Lozupone C,

1020            Zaneveld JR, Vázquez-Baeza Y, Birmingham A. 2017. Normalization and

1021            microbial differential abundance strategies depend upon data characteristics.

1022            Microbiome 5:27.

1023    116.    Martino C, Morton JT, Marotz CA, Thompson LR, Tripathi A, Knight R, Zengler

1024            K. 2019. A novel sparse compositional technique reveals microbial perturbations.

1025            mSystems 4:e00016-19.

1026    117.    Silverman JD, Washburne AD, Mukherjee S, David LA. 2017. A phylogenetic

1027            transform enhances analysis of compositional microbiota data. Elife 6:e21887.

1028    118.    Bates D, Mächler M, Bolker B, Walker S. 2015. Fitting linear mixed-effects

1029            models using lme4. J Stat Softw 67:1-48.

1030    119.    Goode K, Rey K. 2019. ggResidpanel: panels and interactive versions of

1031            diagnostic plots using 'ggplot2'.

1032    120.    Kuznetsova A, Brockhoff PB, Christensen RHB. 2017. lmerTest package: tests in

1033            linear mixed effects models. J Stat Softw 82.

1034    121.    Lenth R. 2019. emmeans: estimated marginal means, aka least-squares means.



- 
- 1035    122.    Anderson MJ. 2001. A new method for non-parametric multivariate analysis of  
1036            variance. *Austral Ecol* 26:32-46.
- 1037    123.    Anderson MJ. 2006. Distance-based tests for homogeneity of multivariate  
1038            dispersions. *Biometrics* 62:245-253.
- 1039    124.    Oksanen J, Blanchet FG, Friendly M, Kindt R, Legendre P, McGlinn D, Minchin  
1040            PR, O'Hara RB, Simpson GL, Solymos P, Stevens MHH, Szoecs E, Wagner H.  
1041            2019. *vegan: Community Ecology Package*.  
1042

## Tables

**Table 1. PERMANOVA results and subsequent conditional contrasts.**

| Distance matrix                | Main effects       |               | Interaction | Conditional contrasts    |                          |                           |                         |
|--------------------------------|--------------------|---------------|-------------|--------------------------|--------------------------|---------------------------|-------------------------|
|                                | Diet               | Sample origin |             | REF-DID<br>VS.<br>IM-DID | REF-DIM<br>VS.<br>IM-DIM | REF-DID<br>VS.<br>REF-DIM | IM-DID<br>VS.<br>IM-DIM |
| Jaccard                        | 0.001              | 0.001         | 0.001       | 0.001                    | 0.001                    | 0.001                     | 0.001                   |
| Unweighted UniFrac             | 0.001 <sup>1</sup> | 0.001         | 0.001       | 0.001 <sup>1</sup>       | 0.001                    | 0.001                     | 0.001                   |
| Aitchison                      | 0.001              | 0.003         | 0.004       | 0.002                    | 0.004                    | 0.004 <sup>1</sup>        | 0.002 <sup>1</sup>      |
| PHILR (Euclidean) <sup>2</sup> | 0.001              | 0.001         | 0.001       | 0.001                    | 0.005                    | 0.001                     | 0.001                   |

REF, reference diet; IM, insect meal diet; DID, distal intestine digesta; DIM, distal intestine mucosa.

<sup>1</sup>Monte Carlo *p* value.

<sup>2</sup>Phylogenetic isometric log-ratio transformed Euclidean distance.

1048 **Table 2. Test of homogeneity of multivariate dispersions among groups.**

| Distance matrix                | Conditional contrasts    |                          |                           |                         |
|--------------------------------|--------------------------|--------------------------|---------------------------|-------------------------|
|                                | REF-DID<br>VS.<br>IM-DID | REF-DIM<br>VS.<br>IM-DIM | REF-DID<br>VS.<br>REF-DIM | IM-DID<br>VS.<br>IM-DIM |
| Jaccard                        | 0.002                    | 0.087                    | 0.045                     | 0.002                   |
| Unweighted UniFrac             | 0.002                    | 0.711                    | 0.200                     | 0.002                   |
| Aitchison                      | 0.453                    | 0.046                    | 0.046                     | 0.369                   |
| PHILR (Euclidean) <sup>1</sup> | 0.240                    | 0.266                    | 0.240                     | 0.266                   |

1049 REF, reference diet; IM, insect meal diet; DID, distal intestine digesta; DIM, distal intestine mucosa.

1050 <sup>1</sup>Phylogenetic isometric log-ratio transformed Euclidean distance.

Figures

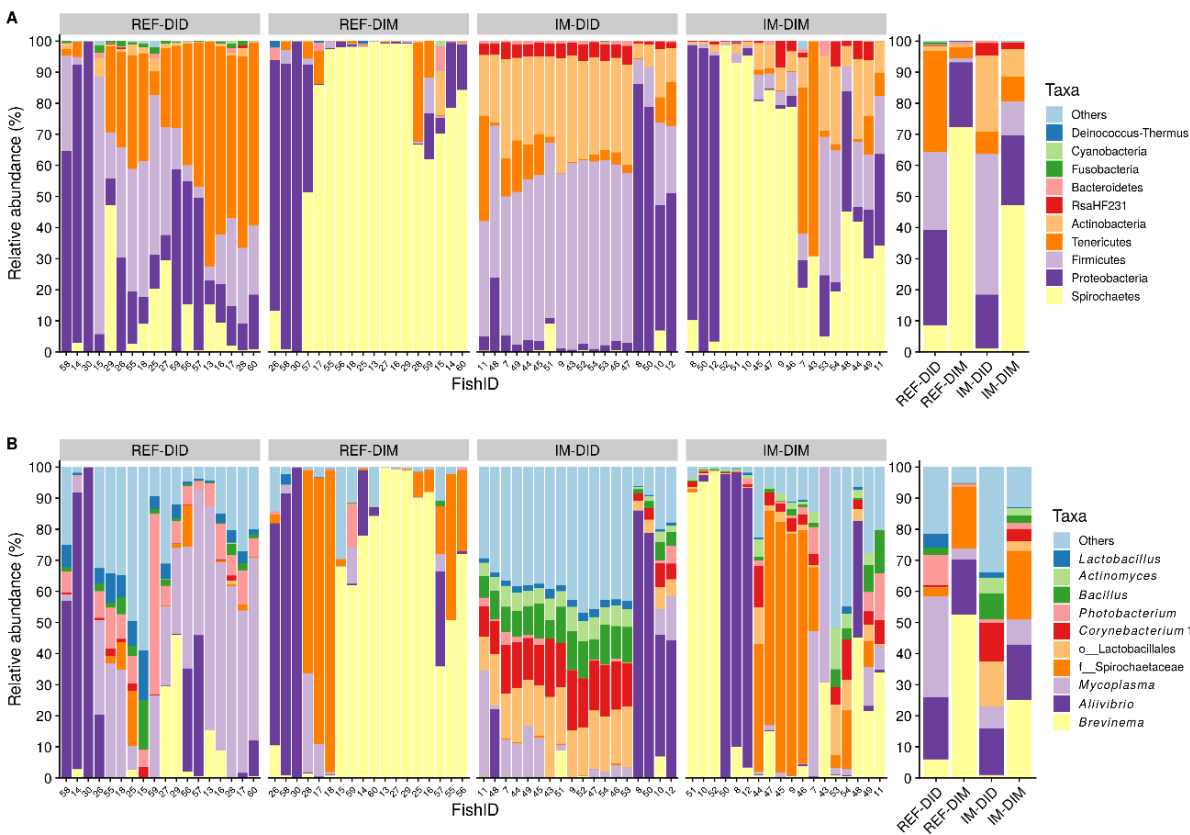

**Figure 1. Top 10 most abundant taxa of all samples at phylum (A) and genus (B) level.** The samples are grouped by sample origins and dietary treatments. The mean relative abundance of each taxon within the same group is displayed on the right side. o\_\_, order; f\_\_, family; REF, reference diet; IM, insect meal diet; DID, distal intestine digesta; DIM, distal intestine mucosa.

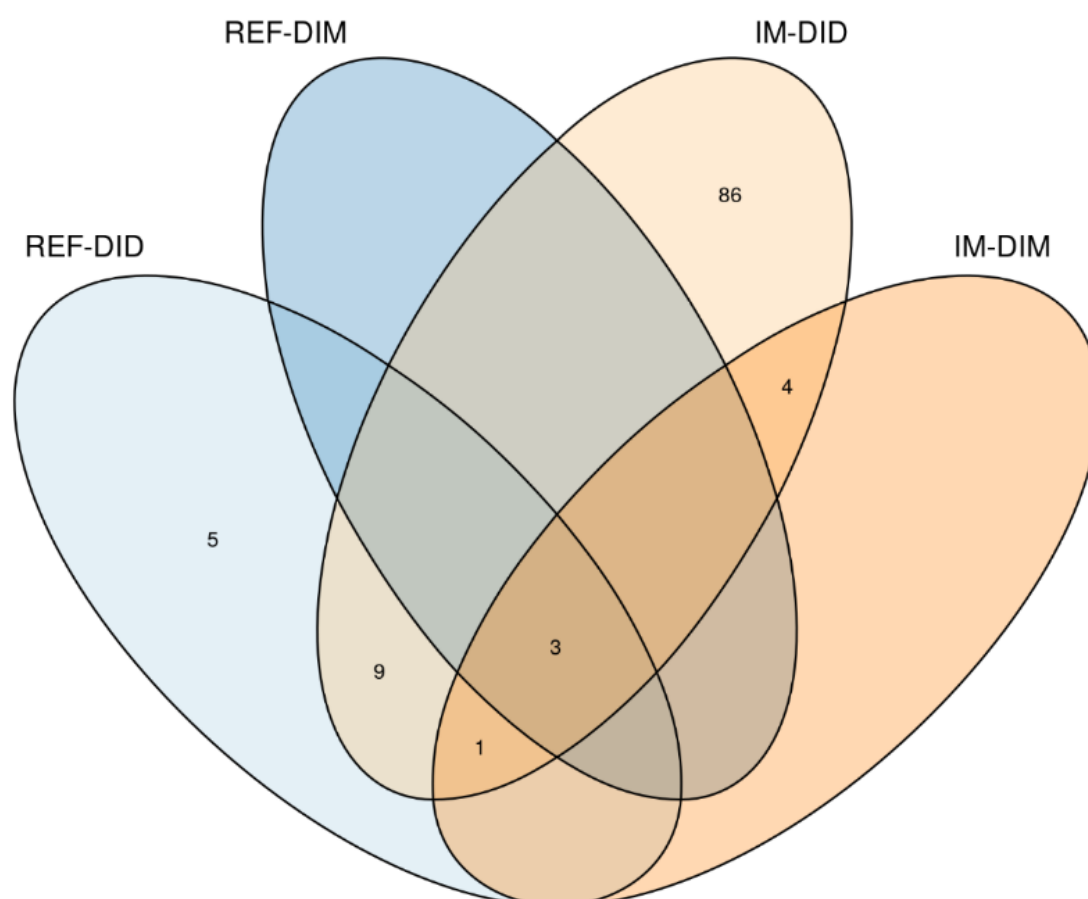

**Figure 2. Venn's diagram showing the shared and unique core microbiota in each sample type.** The core microbiota was computed using a prevalence threshold of 80%. REF, reference diet; IM, insect meal diet; DID, distal intestine digesta; DIM, distal intestine mucosa.

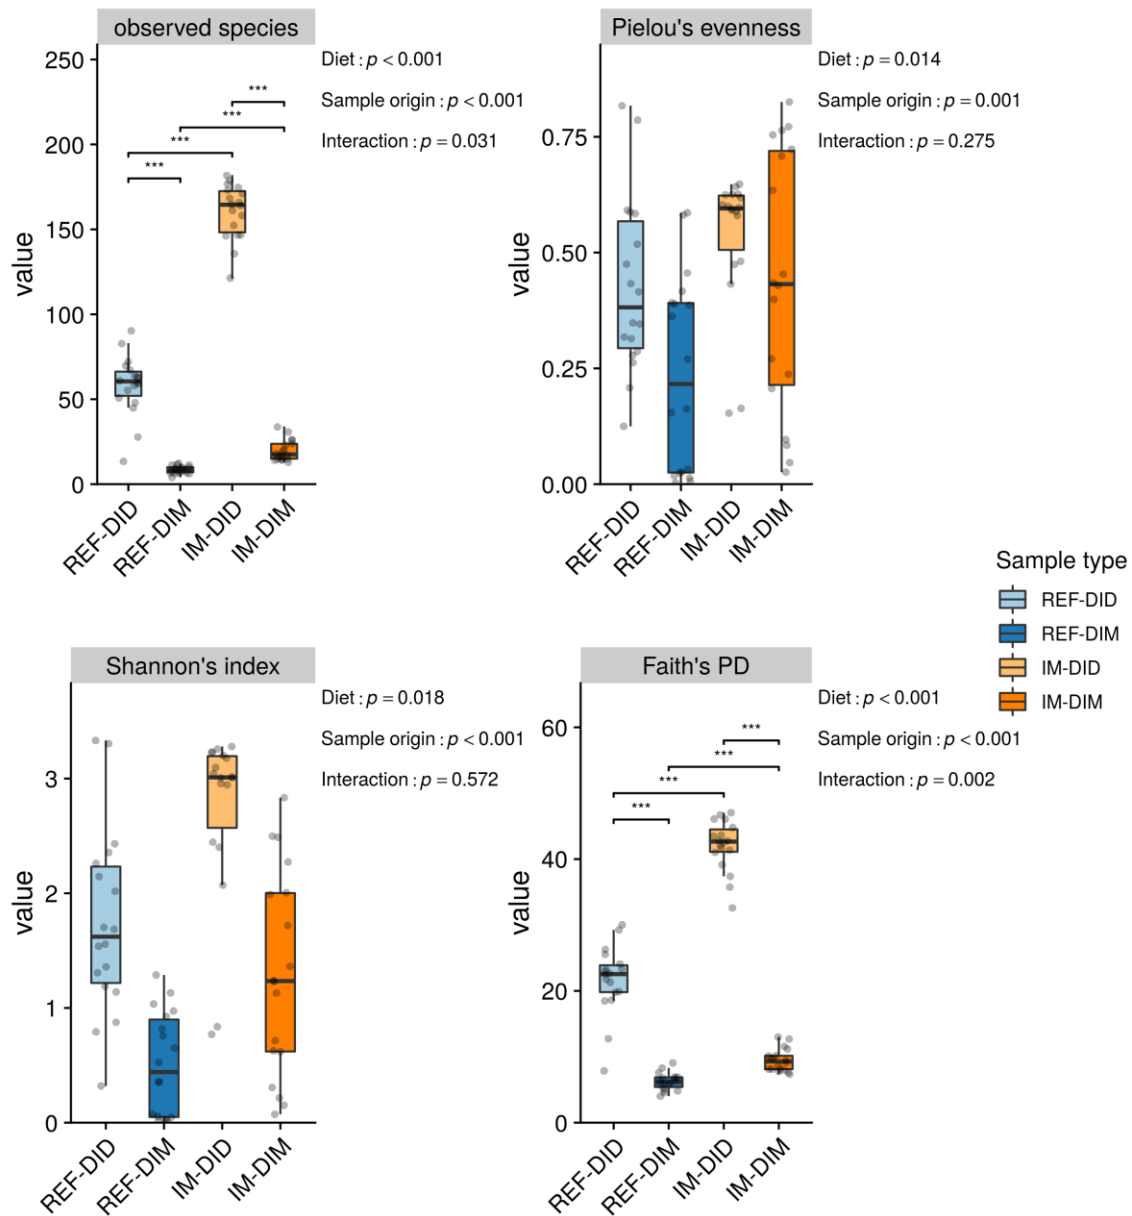

**Figure 3. The sample origin and diet effects on the alpha-diversity of distal intestinal microbiota in seawater phase Atlantic salmon.** The  $p$  value of the main effects and their interaction are displayed on the top-right corner of each sub-plot. Asterisks denote statistically significant differences (\*,  $p < 0.05$ ; \*\*,  $p < 0.01$ ; \*\*\*,  $p < 0.001$ ). PD, phylogenetic diversity; REF, reference diet; IM, insect meal diet; DID, distal intestine digesta; DIM, distal intestine mucosa.

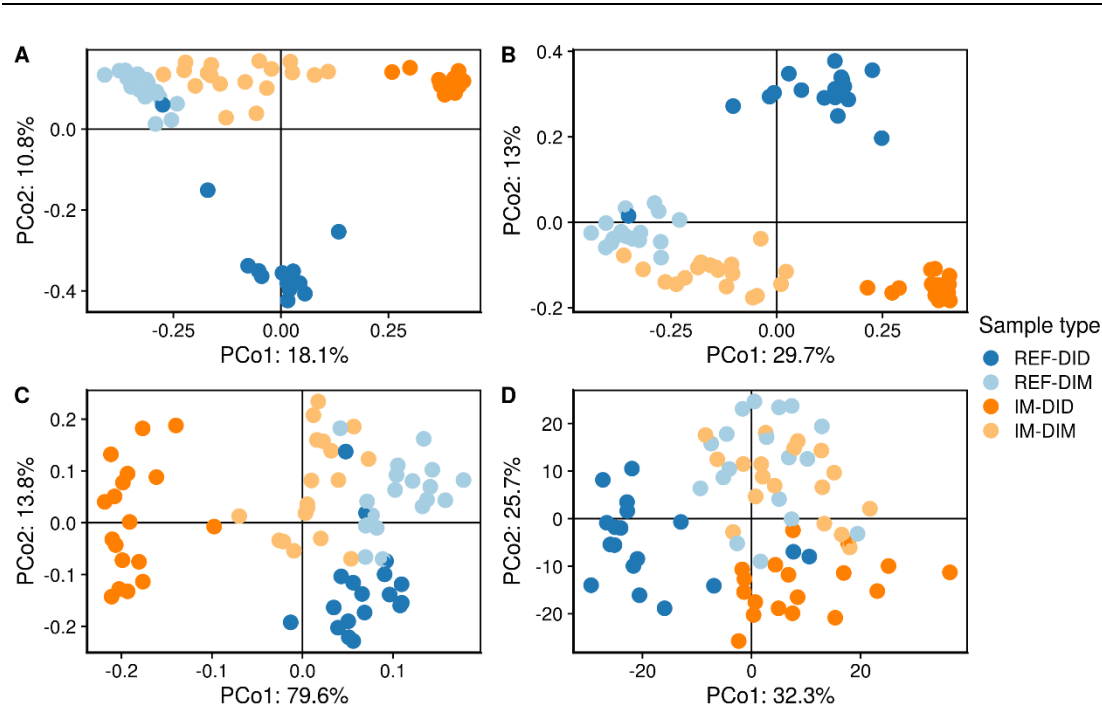

**Figure 4. The sample origin and diet effects on the beta-diversity of distal intestinal microbiota in seawater phase Atlantic salmon.** The PCoA plots were built on Jaccard (A), unweighted UniFrac (B), Aitchison (C) and PHILR transformed Euclidean (D) distance matrix, respectively. PCo, principle coordinate; PHILR, phylogenetic isometric log-ratio; REF, reference diet; IM, insect meal diet; DID, distal intestine digesta; DIM, distal intestine mucosa.

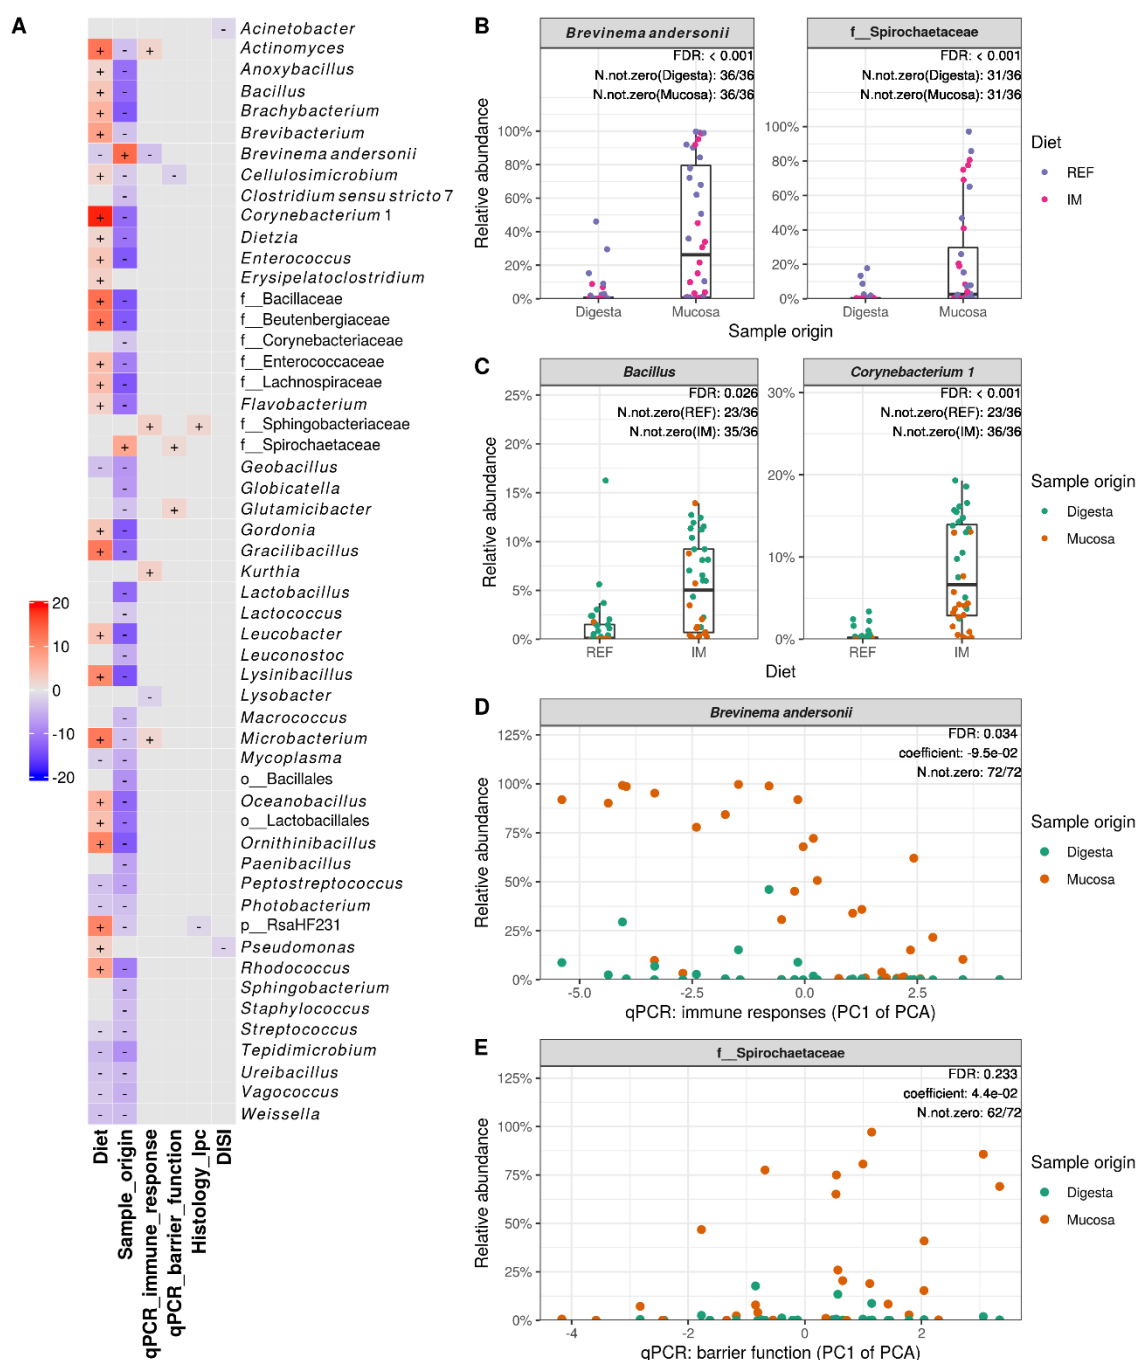

**Figure 5. Significant associations between microbial clades and sample metadata. (A)**

Heatmap summarizing all the significant associations between microbial clades and sample metadata. Color key:  $-\log(q\text{-value}) \times \text{sign}(\text{coefficient})$ . Cells that denote significant associations are colored (red or blue) and overlaid with a plus (+) or minus (-) sign that indicates the direction of association: Diet (+), higher abundance in salmon fed the IM diet; Sample\_origin (+), higher abundance in mucosa samples; Histology\_lpc (+),



---

1079 higher abundance in salmon scored abnormal regarding lamina propria cellularity (lpc) in  
1080 the distal intestine; DISI (+), positive correlation between microbial clade abundance and  
1081 distal intestine somatic index (DISI); qPCR\_immune\_response (+) /  
1082 qPCR\_barrier\_function (+), negative correlation between microbial clade abundance and  
1083 the gene expression levels. (B) Taxa that are more abundant in the intestinal mucosa than  
1084 the digesta. (C) Representative taxa showing increased relative abundances in both  
1085 intestinal digesta and mucosa of salmon fed the IM diet. (D) The positive correlation  
1086 between the relative abundance of *B. andersonii* and immune gene expression levels in  
1087 the distal intestine. Note that the expression levels of the immune genes decreased as the  
1088 PC1 of the PCA increased. (E) The negative correlation between the relative abundance  
1089 of the unclassified *Spirochaetaceae* and the expression levels of barrier function relevant  
1090 genes. Also note that the expression levels of the barrier function relevant genes decreased  
1091 as the PC1 of the PCA increased. p\_\_, phylum; o\_\_, order; f\_\_, family; FDR, false  
1092 discovery rate; N.not.zero, number of observations that are not zero; REF, reference diet;  
1093 IM, insect meal diet.

1094 **Supplemental tables**

1095 **Table S1. Contaminating features removed from the ASV table (available online).**

1096 **Table S2. The prevalence of core taxa in different sample types (available online).**

## Supplemental figures

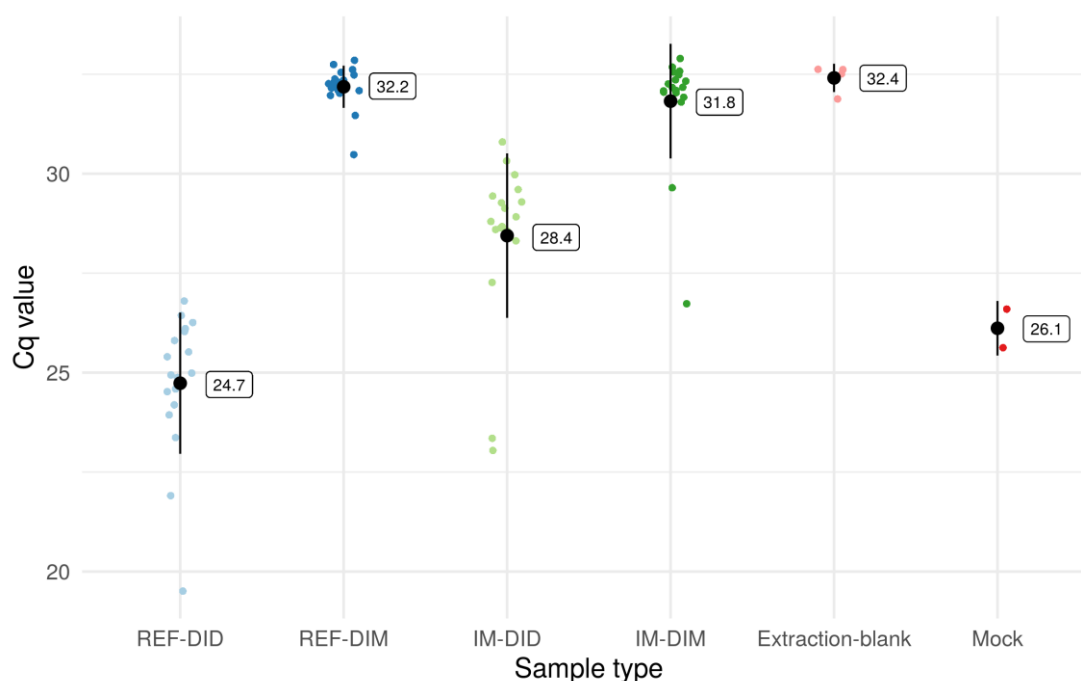

**Figure S1. Quantification of bacterial 16S rRNA gene in different sample types using qPCR.** Since the Cq values of most mucosa-associated samples were out of the linear range of the standard curve, the Cq value was used as a proxy of 16S rRNA gene quantity which is reliable for the screening of contaminant sequences. Data are presented as mean  $\pm$  1 standard deviation overlaying the raw data points. Abbreviations: REF, reference diet; IM, insect meal diet; DID, distal intestine digesta; DIM, distal intestine mucosa.

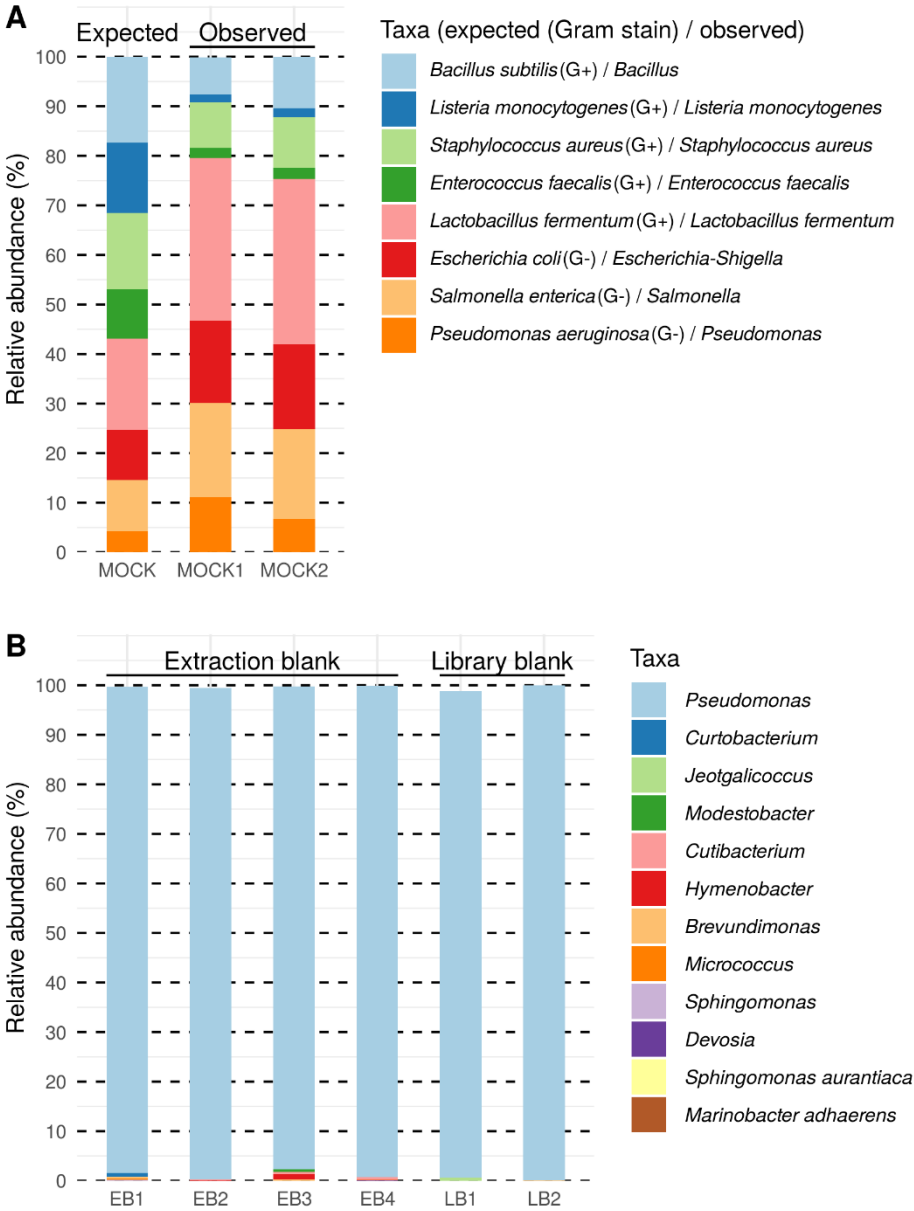

**Figure S2. Taxonomic profile of the mock (A) and contaminating features in the negative controls (B).** The lowest level of taxonomic ranks was displayed for each taxon. EB, extraction blank; LB, library blank.

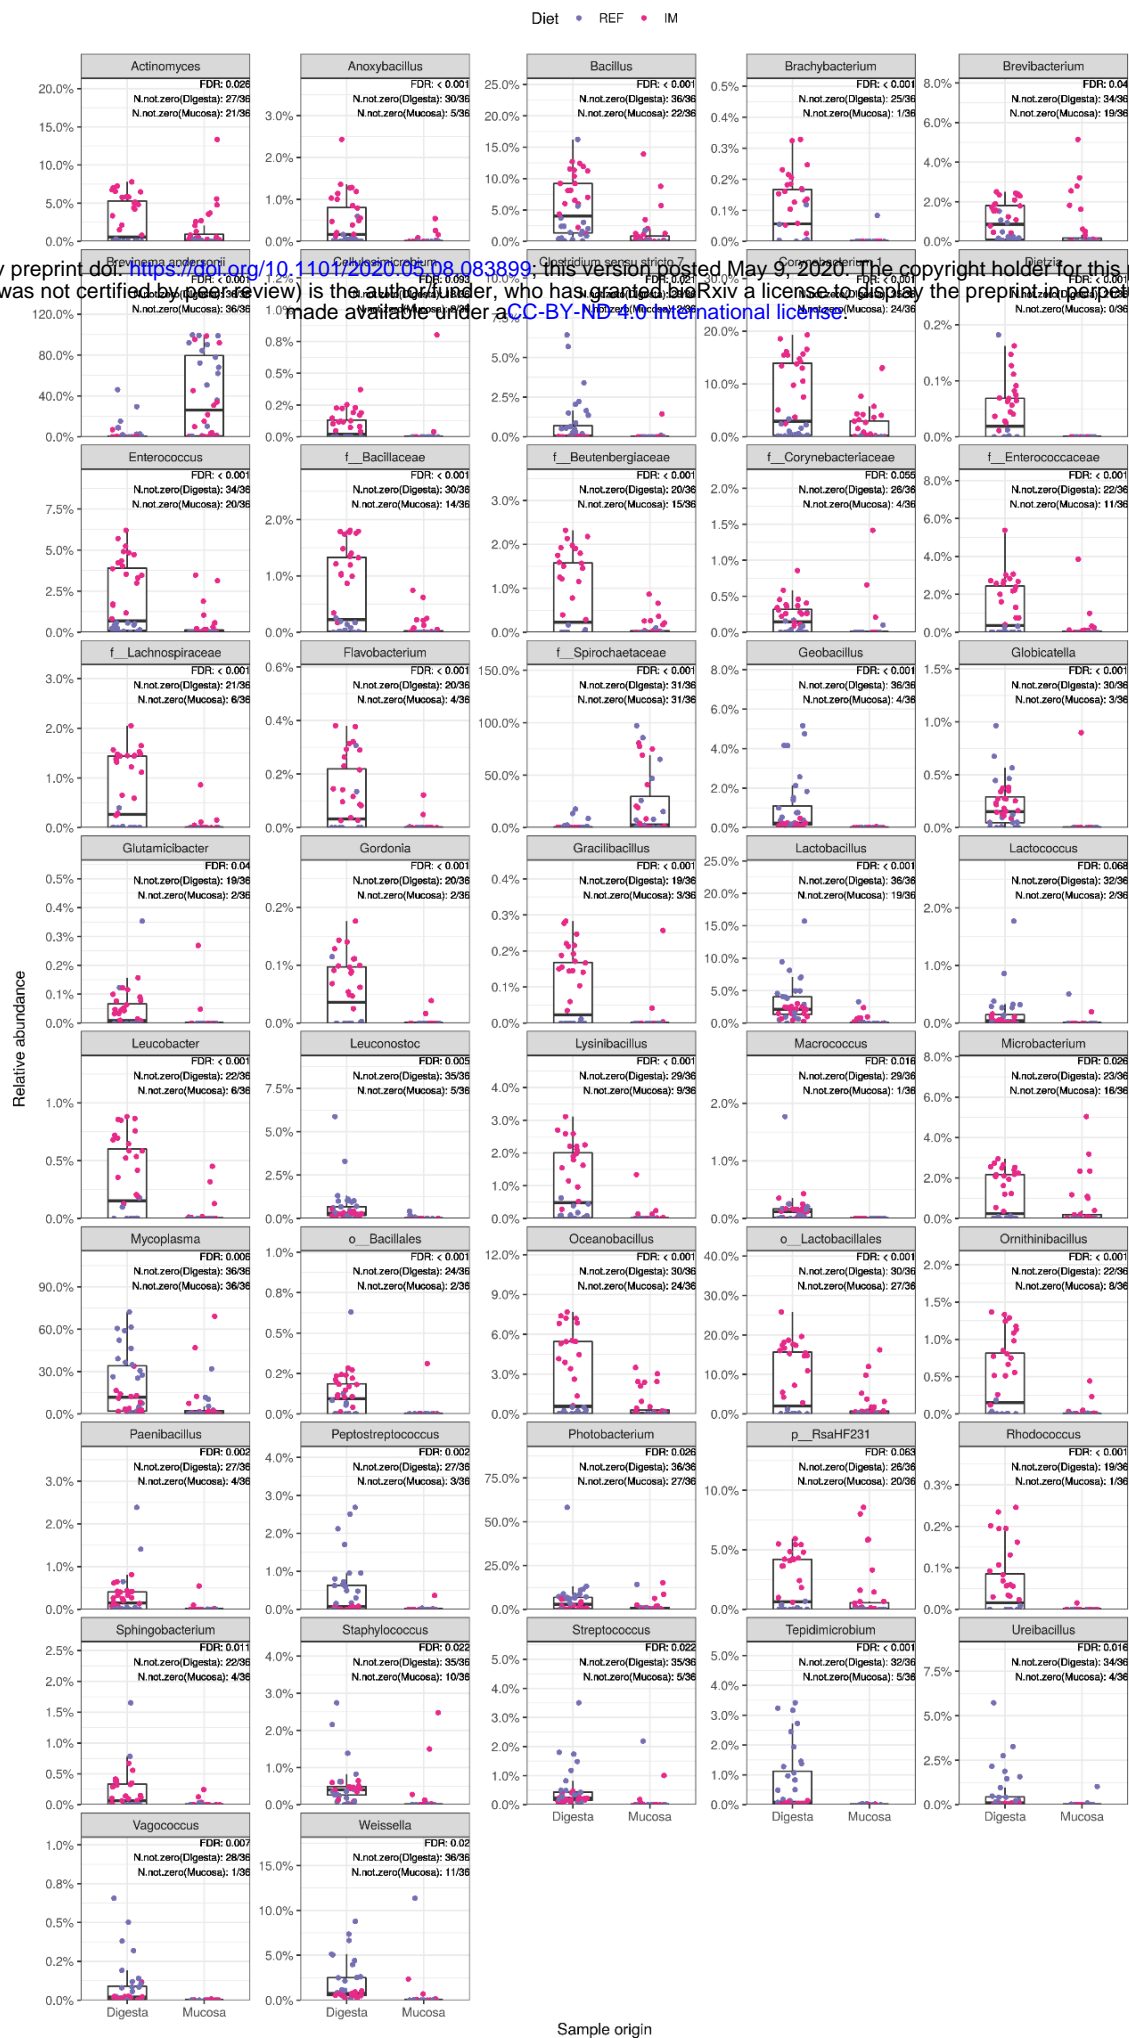

Figure S3. Microbial clades showing significant associations with sample origin.

FDR, false discovery rate; N.not.zero, number of non-zero observations; REF, reference

diet; IM, insect meal diet.

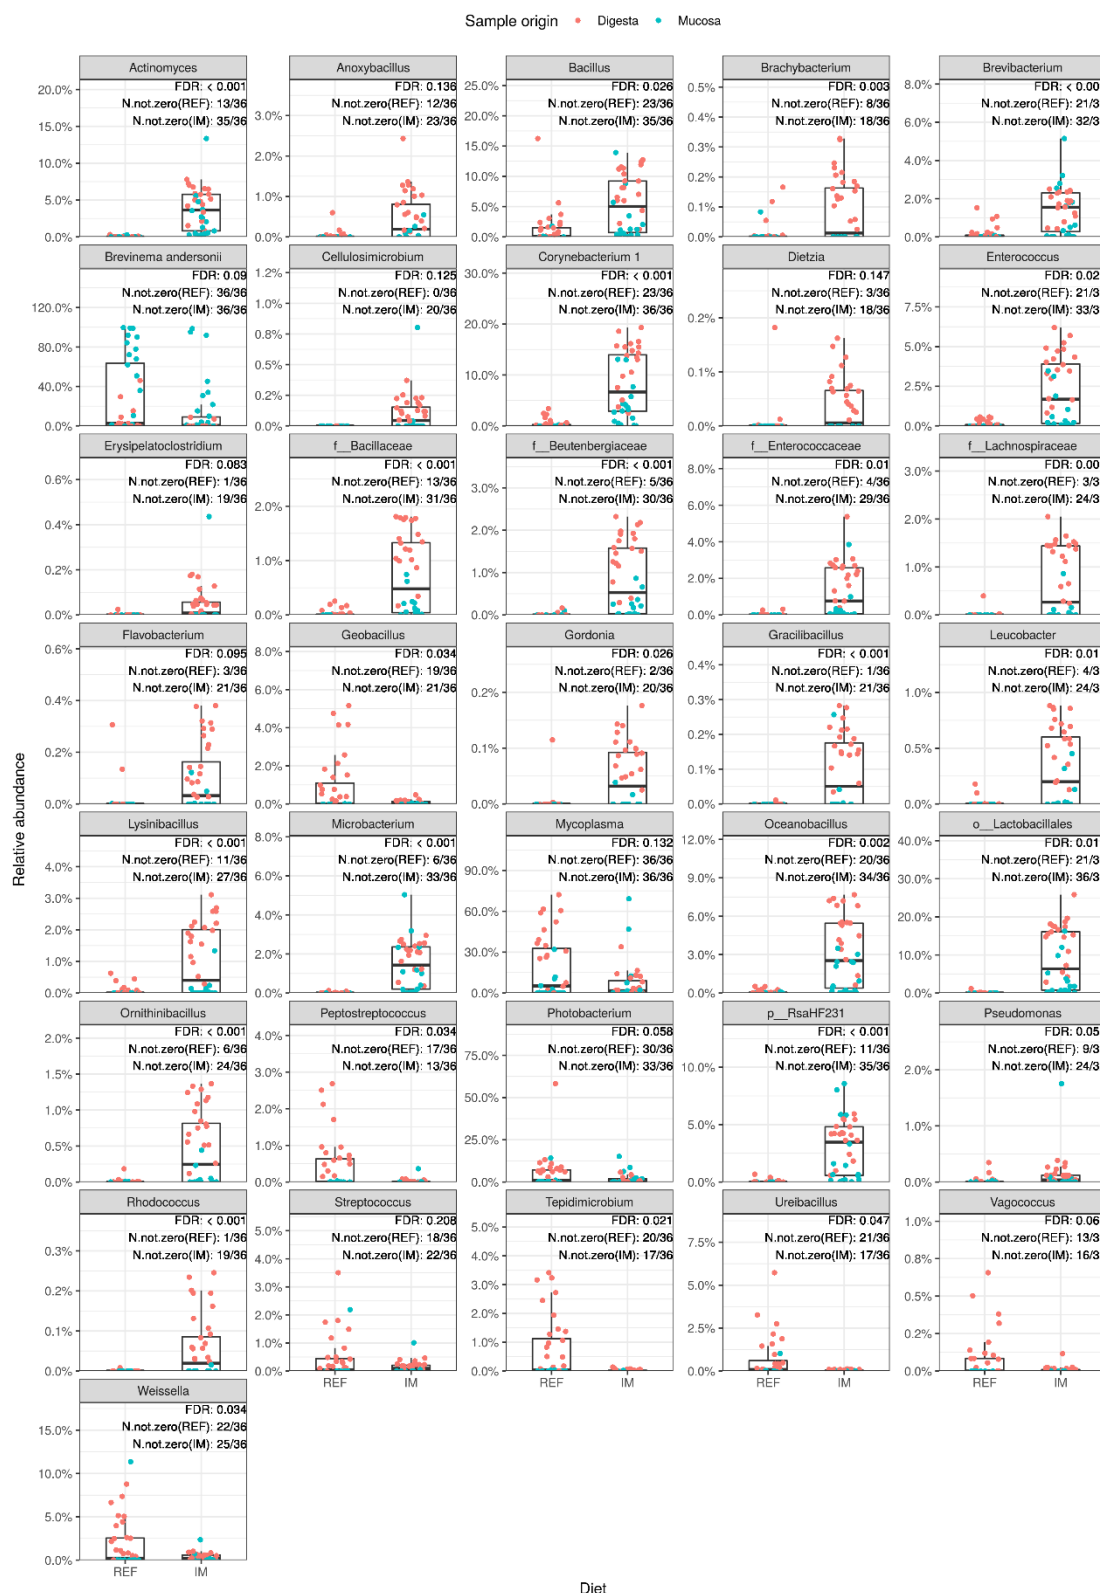

**Figure S4. Microbial clades showing significant associations with diet.** FDR, false discovery rate; N.not.zero, number of non-zero observations; REF, reference diet; IM, insect meal diet.

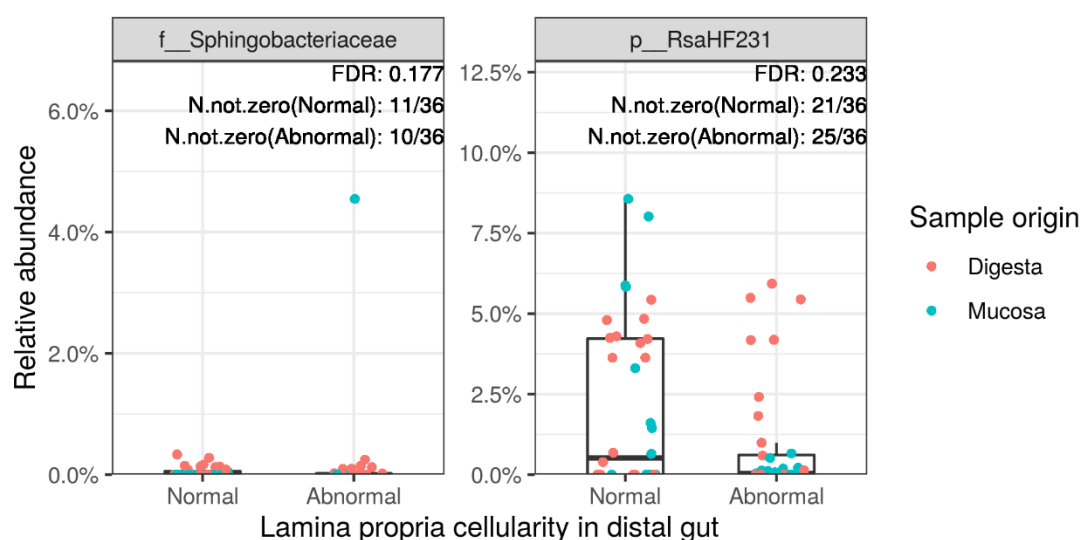

**Figure S5. Microbial clades showing significant associations with histological scores on lamina propria cellularity in the distal intestine.** FDR, false discovery rate; N.not.zero, number of non-zero observations.

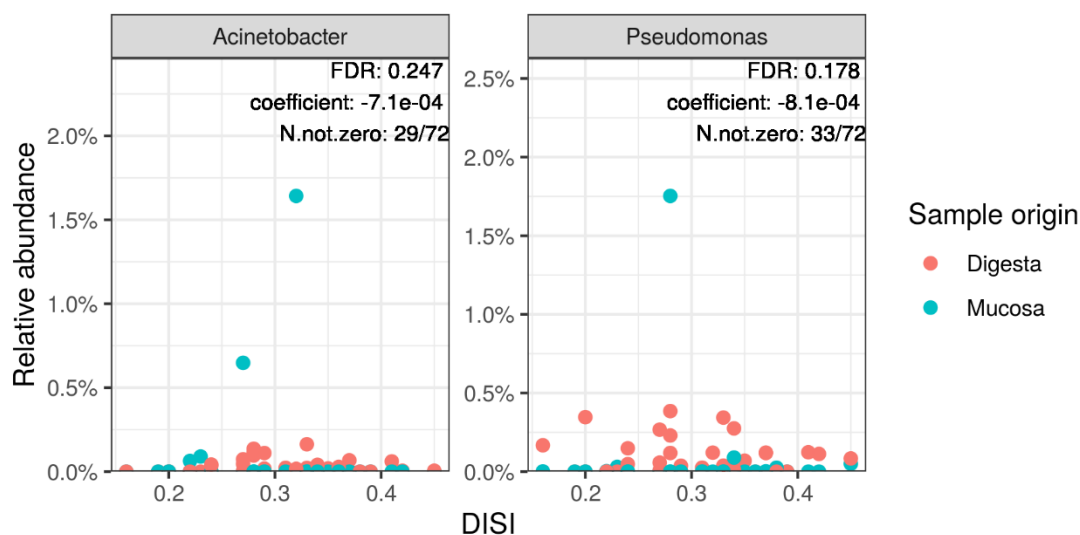

**Figure S6. Microbial clades showing significant associations with distal intestine somatic index (DISI).** FDR, false discovery rate; N.not.zero, number of non-zero observations.



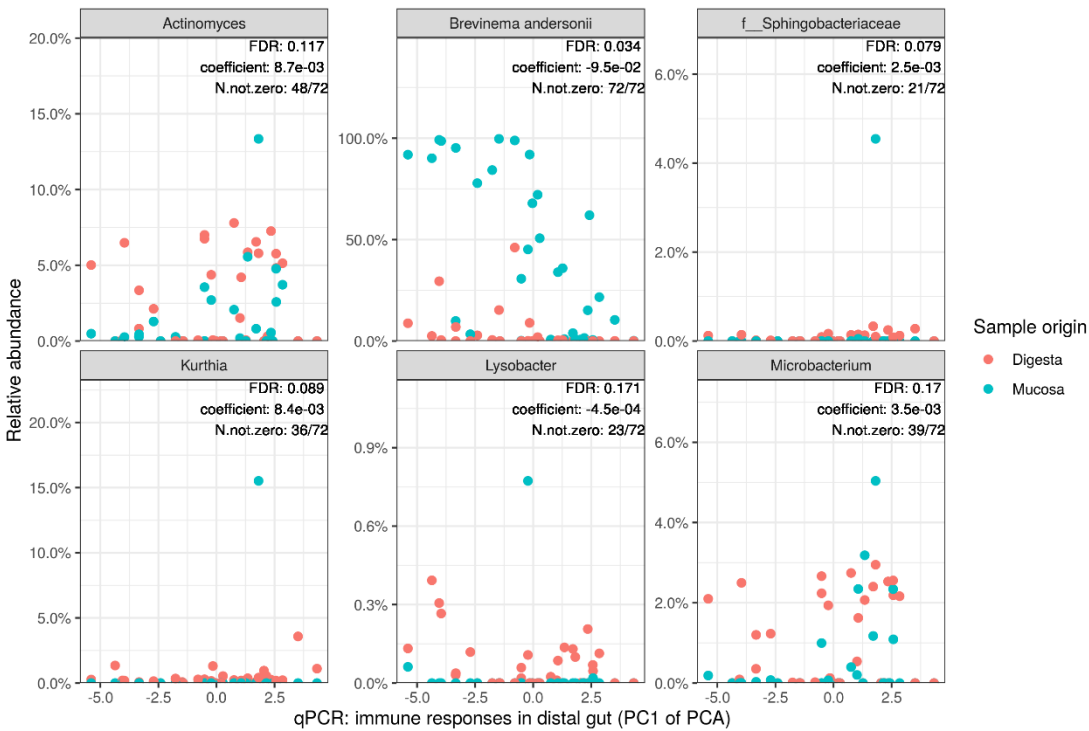

**Figure S7. Microbial clades showing significant associations with immune gene expressions in the distal intestine.** Since the expression levels of immune genes were highly correlated, we ran a principle component analysis (PCA) and used the first principle component (PC1) for the association testing to avoid multicollinearity and reduce the number of association testing. Note that the expression levels of immune genes decrease as the PC1 increases from left to right. Hence, a positive correlation coefficient denotes a negative association between the microbial clade and immune gene expressions, and vice versa. FDR, false discovery rate; N.not.zero, number of non-zero observations.

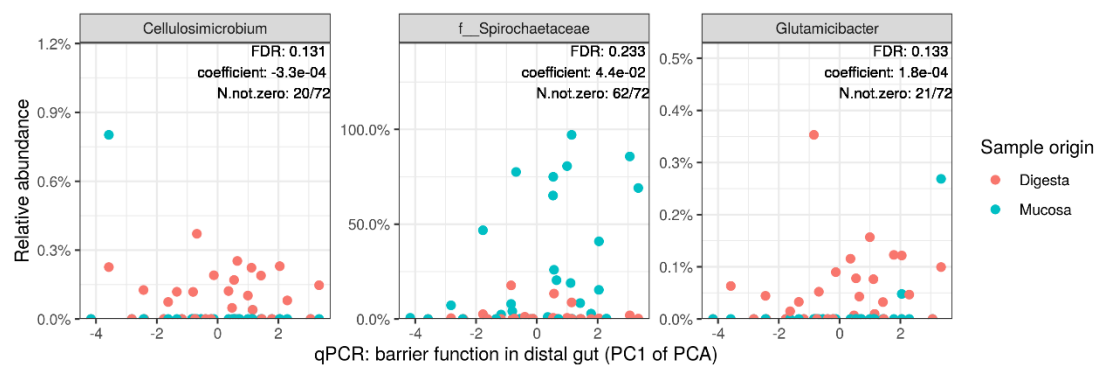

**Figure S8. Microbial clades showing significant associations with expressions of barrier function related genes in the distal intestine.** Since the expression levels of barrier function related genes were highly correlated, we ran a principle component analysis (PCA) and used the first principle component (PC1) for the association testing to avoid multicollinearity and reduce the number of association testing. Note that the expression levels of barrier function related genes decrease as the PC1 increases from left to right. Hence, a positive correlation coefficient denotes a negative association between the microbial clade and barrier function related gene expressions, and vice versa. FDR, false discovery rate; N.not.zero, number of non-zero observations.
